# Supplementary material for: Synthesis of an advanced metal-guided photochromic system for molecular keypad lock: detailed experimental findings and theoretical understanding
Source: Royal Society of Chemistry journal article supplement (doi:10.1039/d1nj06158e), 2022-01-01
Supplement: d1nj06158e1.pdf [file d1nj06158e1.pdf]

## **Electronic Supporting Information**

### **Synthesis of advanced metal-guided photochromic system for molecular keypad lock: A detailed experimental findings and theoretical understanding**

Nandagopal Bar, Pranesh Chowdhury\*, Debrupa Biswas, Arindam Ray, Gourab Kanti Das

Polymer & Nano Research Laboratory, Department of Chemistry, Siksha Bhavana, Visva-Bharati University, Santiniketan – 731 235, India

\*Corresponding Author: E. mail: pranesh\_02@yahoo.co.in.

Telephone: + 91 3463 264983; FAX: +91 3463 261526

| <b>Content</b>                                                                                                                            | <b>Page Number</b> |
|-------------------------------------------------------------------------------------------------------------------------------------------|--------------------|
| 1. <sup>1</sup> H-NMR Spectra of Ligand (L).....S3<br>(Fig.S1)                                                                            | S3                 |
| 2. <sup>13</sup> C-NMR Spectra of Ligand (L) .....S4<br>(Fig.S2)                                                                          | S4                 |
| 3. <sup>1</sup> H-NMR Spectra of the 1.....S5<br>(Fig.S3)                                                                                 | S5                 |
| 4. <sup>13</sup> C-NMR Spectra of the 1.....S6<br>(Fig.S4)                                                                                | S6                 |
| 5. ESI-Mass spectrometry of Ligand (L).....S7<br>(Fig.S5)                                                                                 | S7                 |
| 6. FT-IR Spectra of Ligand (L).....S8<br>(Fig.S6)                                                                                         | S8                 |
| 7. The non-photochromic behaviour of the Ligand (L).....S9<br>(Fig.S7 & S8)                                                               | S9                 |
| 8. Full reference of Gaussian Software.....S10                                                                                            | S10                |
| 9. Coordinate of the stationary points associated to the Potential Energy Surface<br>(PES) using M06-2X hybrid functional.....S11-<br>S25 | S11-<br>S25        |
| 10. Coordinate of the stationary points associated to the TD-DFT<br>analysis.....S26-S30                                                  | S26-S30            |

# 1. <sup>1</sup>H-NMR Spectra of the ligand (L):

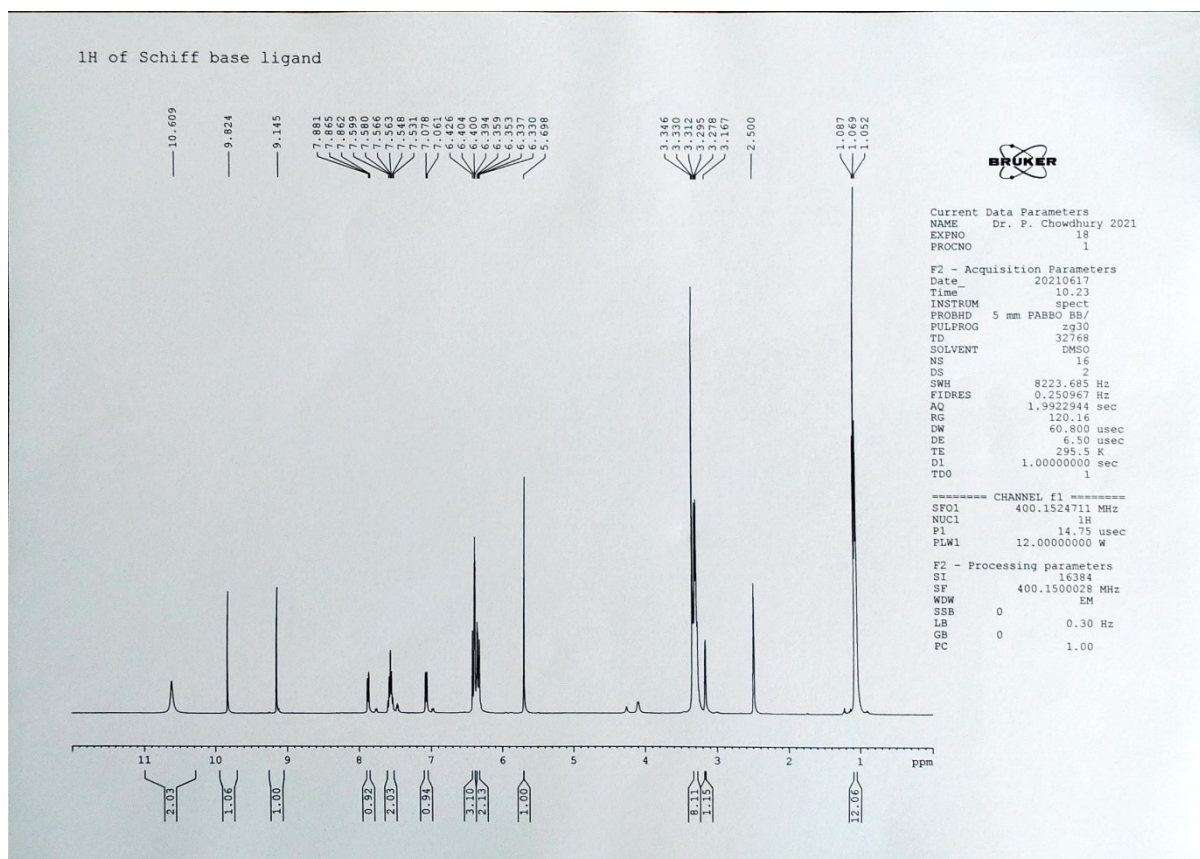

**Fig. S1:** <sup>1</sup>H-NMR spectra of the ligand (L) in d<sup>6</sup>-DMSO

## 2. <sup>13</sup>C-NMR Spectra of the ligand (L):

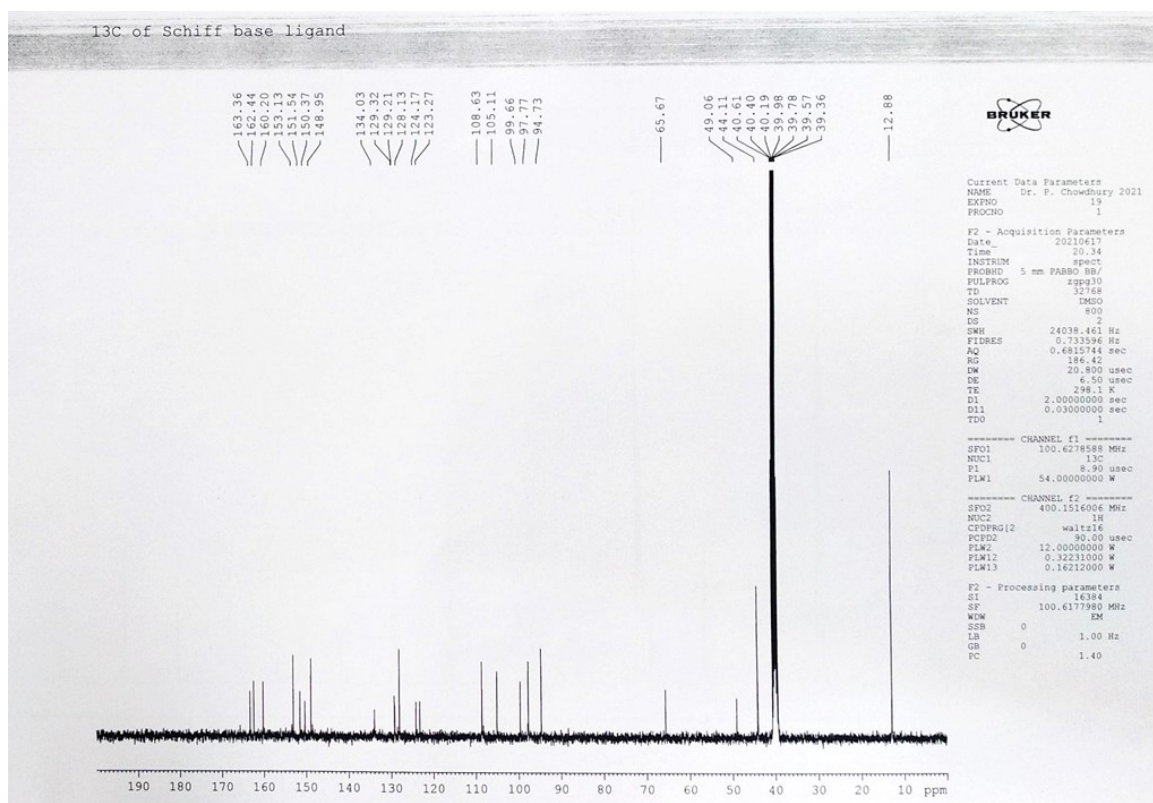

**Fig. S2:** <sup>13</sup>C-NMR spectra of the ligand (L) in d<sup>6</sup>-DMSO

### 3. <sup>1</sup>H-NMR Spectra of the 1:

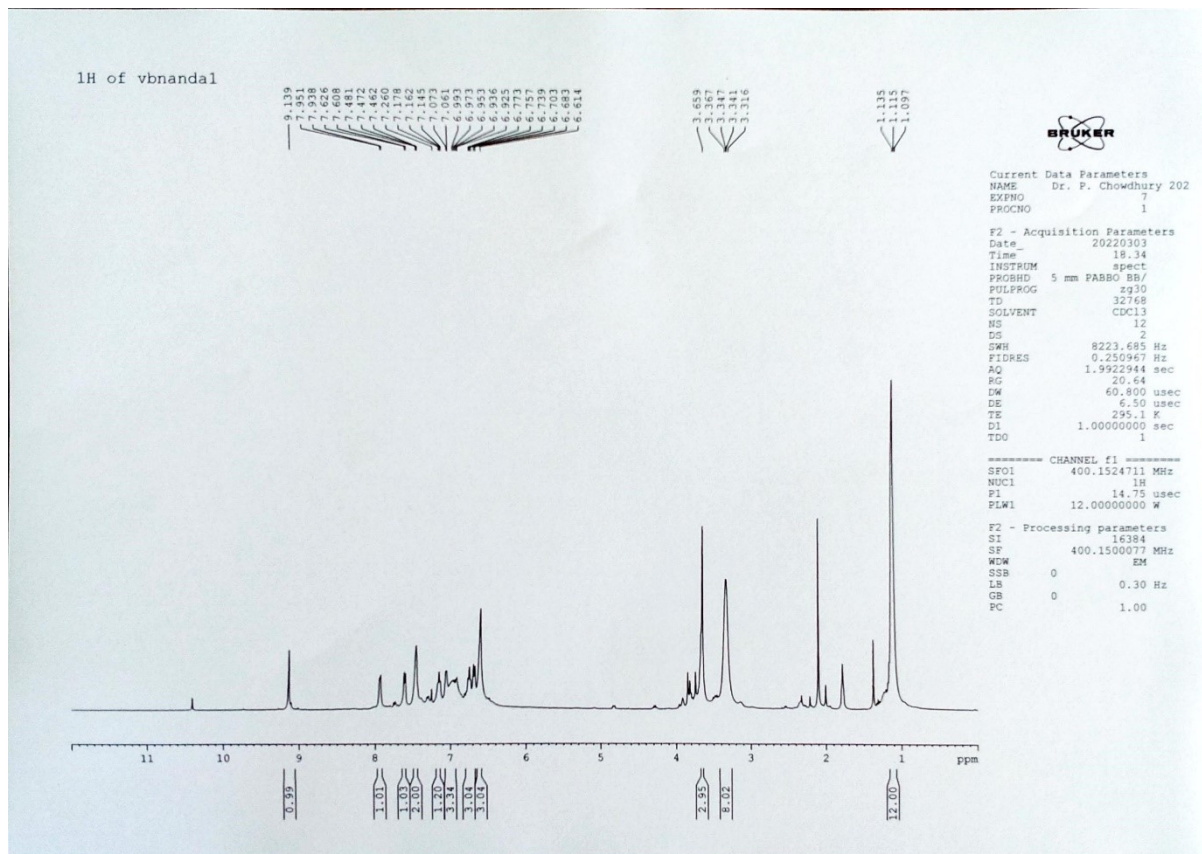

**Fig. S3:** <sup>1</sup>H-NMR spectra of the 1 in CDCl<sub>3</sub>

#### 4. <sup>13</sup>C-NMR Spectra of the 1:

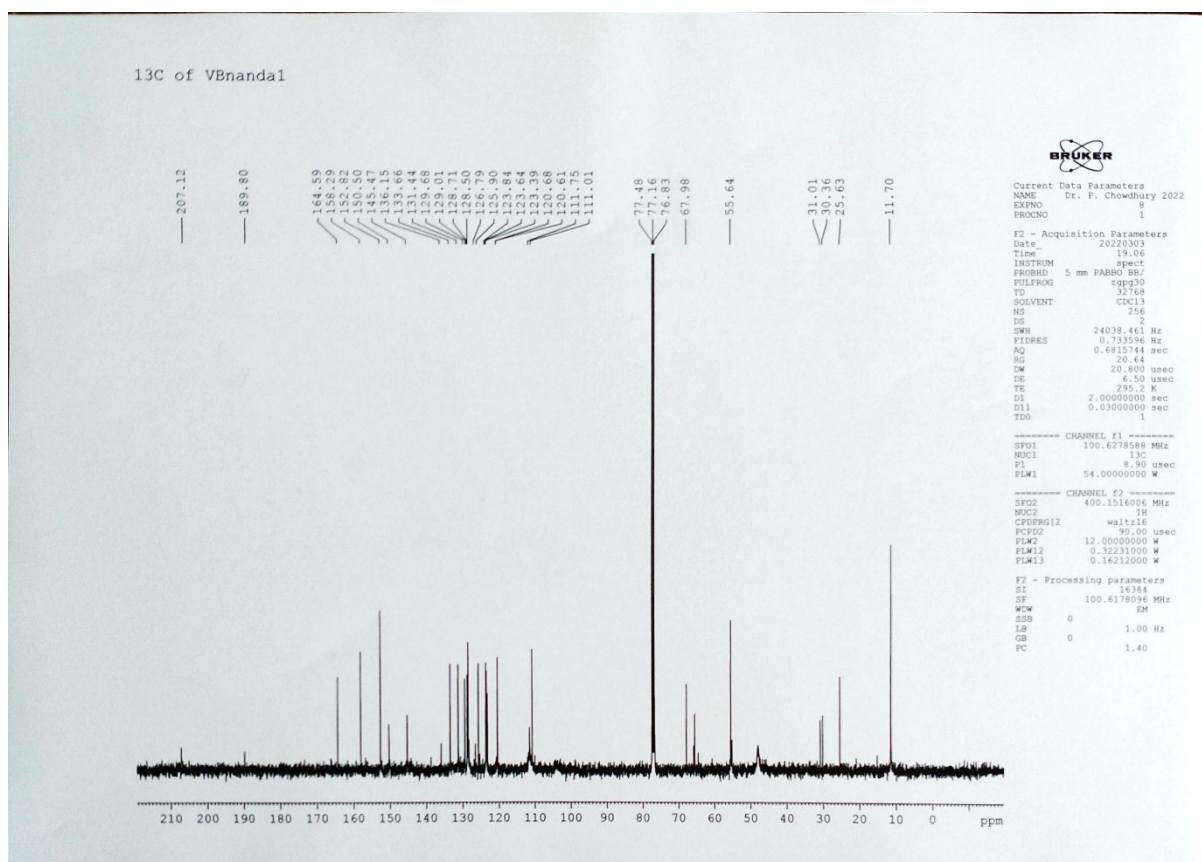

Fig. S4: <sup>13</sup>C-NMR spectra of the 1 in CDCl<sub>3</sub>

**5. ESI-Mass spectrometry of Ligand (L):**

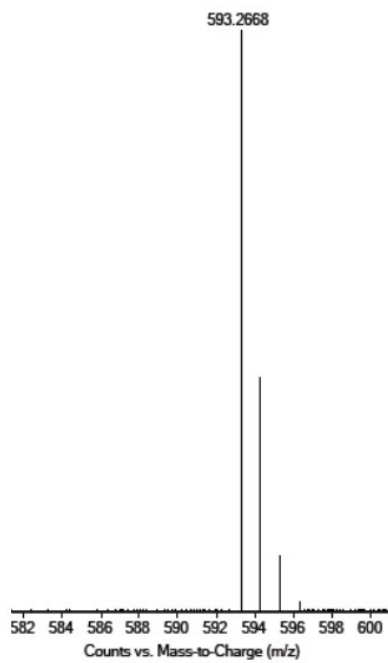

**Fig. S5:** ESI-Mass spectrometry of the ligand (L),  $m/z = 593$

## 6. FT-IR spectra of the ligand (L):

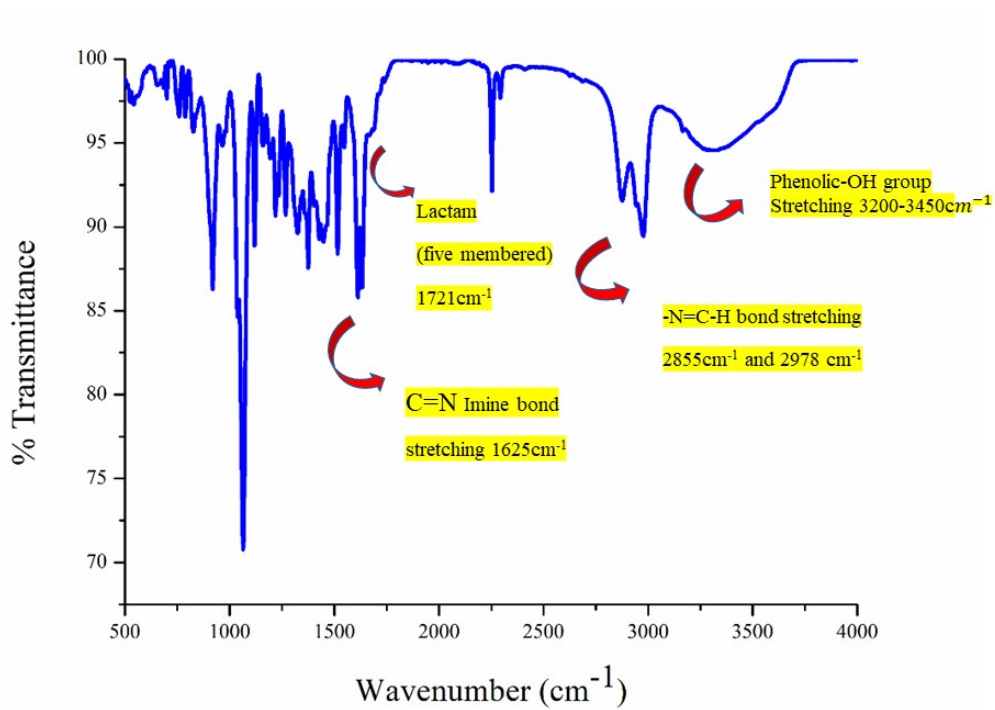

**Fig. S6:** FT-IR spectra of the ligand (L)



## 7. The non-photochromic behaviour of the Ligand (L):

### UV-Vis spectra:

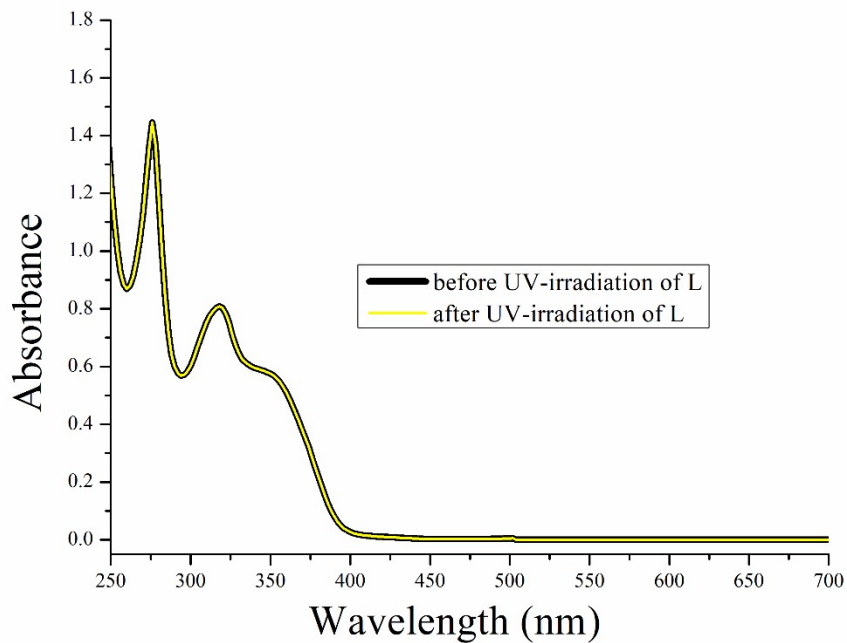

**Fig. S7:** Absorption spectra of the ligand (L) before and after UV-irradiation

### FT-IR spectra:

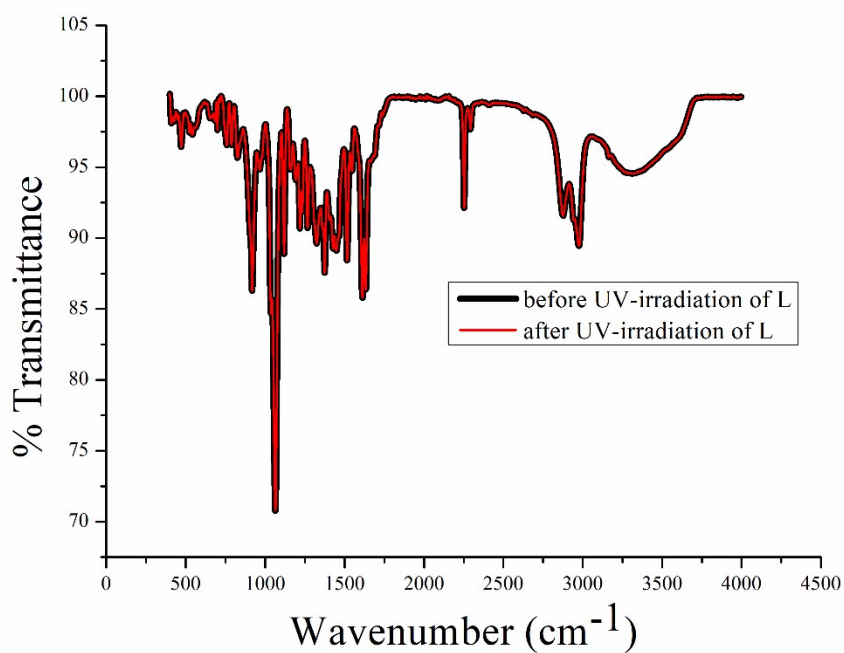

**Fig. S8:** FT-IR spectra of the ligand (L) before and after UV-irradiation

## **8. Gaussian 09 Full Reference:**

Gaussian 09, Revision C.01, M. J. Frisch, G. W. Trucks, H. B. Schlegel, G. E. Scuseria, M. A. Robb, J. R. Cheeseman, G. Scalmani, V. Barone, B. Mennucci, G. A. Petersson, H. Nakatsuji, M. Caricato, X. Li, H. P. Hratchian, A. F. Izmaylov, J. Bloino, G. Zheng, J. L. Sonnenberg, M. Hada, M. Ehara, K. Toyota, R. Fukuda, J. Hasegawa, M. Ishida, T. Nakajima, Y. Honda, O. Kitao, H. Nakai, T. Vreven, J. A. Montgomery, Jr., J. E. Peralta, F. Ogliaro, M. Bearpark, J. J. Heyd, E. Brothers, K. N. Kudin, V. N. Staroverov, T. Keith, R. Kobayashi, J. Normand, K. Raghavachari, A. Rendell, J. C. Burant, S. S. Iyengar, J. Tomasi, M. Cossi, N. Rega, J. M. Millam, M. Klene, J. E. Knox, J. B. Cross, V. Bakken, C. Adamo, J. Jaramillo, R. Gomperts, R. E. Stratmann, O. Yazyev, A. J. Austin, R. Cammi, C. Pomelli, J. W. Ochterski, R. L. Martin, K. Morokuma, V. G. Zakrzewski, G. A. Voth, P. Salvador, J. J. Dannenberg, S. Dapprich, A. D. Daniels, O. Farkas, J. B. Foresman, J. V. Ortiz, J. Cioslowski and D. J. Fox, Gaussian, Inc., Wallingford CT, 2010.

## **Computational methods:**

Computational Method used: Hybrid DFT functional method M06-2X, M06 and M06L.

Basis set used: LANL2DZ for zinc atom and 6-31G (d, p) basis set for other atoms.

Solvent used for calculation by PCM model: Tetrahydrofuran (THF).

**9. Coordinate of the stationary points associated to the Potential Energy Surface (PES) using M06-2X hybrid functional:**

| St.Pt.                              | General Structure | Ball & Stick model        |          |          |          |          |
|-------------------------------------|-------------------|---------------------------|----------|----------|----------|----------|
| <b>K</b>                            |                   |                           |          |          |          |          |
| <b><u>Cartesian co-ordinate</u></b> |                   | <b><u>Frequencies</u></b> |          |          |          |          |
| -----                               |                   |                           |          |          |          |          |
| Atoms                               | X                 | Y                         | Z        | -11.2892 | 11.7574  | 16.2658  |
| -----                               |                   |                           |          | 17.2957  | 22.3679  | 26.4150  |
|                                     |                   |                           |          | 31.1382  | 32.4399  | 39.4681  |
|                                     |                   |                           |          | 44.0908  | 56.4897  | 59.6142  |
| C                                   | -2.50730          | -3.11396                  | -1.53127 | 62.3065  | 65.0567  | 71.2232  |
| C                                   | -1.67460          | -2.06817                  | -1.85753 | 78.4223  | 88.3354  | 97.3790  |
| C                                   | -1.69205          | -0.84896                  | -1.16260 | 102.6551 | 104.1226 | 114.8681 |
| C                                   | -2.60438          | -0.73981                  | -0.11184 | 125.7310 | 133.2628 | 138.2143 |
| C                                   | -3.45673          | -1.77395                  | 0.24381  | 147.9045 | 161.0645 | 163.2915 |
| C                                   | -3.44424          | -2.99363                  | -0.46420 | 169.1294 | 178.4667 | 185.5215 |
| C                                   | -0.78324          | 0.29158                   | -1.53070 | 194.9893 | 206.0796 | 210.7513 |
| C                                   | -2.06978          | 1.53416                   | 0.25280  | 217.6631 | 219.4732 | 223.9428 |
| C                                   | -1.14210          | 1.54706                   | -0.78752 | 227.4134 | 231.1345 | 236.1403 |
| C                                   | -0.57138          | 2.78903                   | -1.10586 | 250.0909 | 259.0691 | 266.7758 |
| H                                   | 0.13104           | 2.84818                   | -1.93466 | 270.0419 | 276.3883 | 291.9930 |
| C                                   | -0.88836          | 3.94143                   | -0.42444 | 305.2713 | 312.6283 | 328.1308 |
| C                                   | -1.82459          | 3.92226                   | 0.65058  | 334.5179 | 348.7287 | 357.9098 |
| C                                   | -2.41472          | 2.67977                   | 0.95735  | 361.9978 | 365.3077 | 386.9221 |
| H                                   | -2.46864          | -4.01639                  | -2.12650 | 399.1181 | 408.9735 | 419.4378 |
| H                                   | -4.12450          | -1.59755                  | 1.07625  | 428.2684 | 429.9044 | 434.0423 |
| H                                   | -0.43246          | 4.86898                   | -0.74125 | 442.9231 | 449.9666 | 462.2120 |
| H                                   | -3.16733          | 2.56861                   | 1.72453  | 467.7261 | 475.4899 | 479.6125 |
| C                                   | -0.67015          | 0.49019                   | -3.03512 | 486.5360 | 496.1290 | 498.7286 |
| C                                   | -1.67246          | 0.87473                   | -3.91083 | 525.0582 | 530.2223 | 534.8861 |
| C                                   | 0.61441           | 0.22391                   | -3.51215 | 554.3693 | 554.7165 | 565.2363 |
| C                                   | -1.34740          | 0.98351                   | -5.26285 | 570.9367 | 589.5197 | 601.7652 |
| C                                   | 0.95068           | 0.32595                   | -4.86128 | 610.3103 | 614.6591 | 617.6145 |
| C                                   | -0.05536          | 0.71232                   | -5.73612 | 620.8531 | 649.3351 | 651.4076 |
| H                                   | -2.11413          | 1.28475                   | -5.96919 | 654.2079 | 659.7340 | 682.0345 |
| H                                   | 0.15526           | 0.80654                   | -6.79540 | 695.7229 | 704.3535 | 709.4429 |
| H                                   | 1.95660           | 0.11004                   | -5.20461 | 716.4985 | 722.0982 | 727.1625 |
| N                                   | -4.29267          | -4.00863                  | -0.14633 | 731.3062 | 744.5509 | 759.2346 |
| C                                   | -5.35128          | -3.83410                  | 0.84252  | 777.1205 | 788.9418 | 791.3153 |
| C                                   | -4.24370          | -5.29913                  | -0.82752 | 795.5981 | 805.1732 | 807.9126 |
| C                                   | -4.88159          | -4.11866                  | 2.26680  | 809.8693 | 824.3008 | 826.8353 |

|    |          |          |          |           |           |           |
|----|----------|----------|----------|-----------|-----------|-----------|
| C  | -5.05022 | -5.31726 | -2.12316 | 837.6355  | 846.0595  | 855.4945  |
| N  | -2.13753 | 5.05212  | 1.35607  | 865.7769  | 867.2997  | 871.6333  |
| C  | -3.24987 | 4.97637  | 2.31003  | 873.0764  | 893.6953  | 894.8107  |
| C  | -1.71117 | 6.35958  | 0.86010  | 910.4417  | 912.4312  | 938.5560  |
| C  | -3.50998 | 6.25250  | 3.09604  | 946.4264  | 949.2158  | 951.4656  |
| C  | -2.55099 | 6.86138  | -0.31223 | 955.6139  | 956.5301  | 969.8441  |
| O  | -2.69512 | 0.38634  | 0.66369  | 971.5095  | 978.5099  | 979.6253  |
| H  | -4.31574 | 6.05855  | 3.80692  | 991.2537  | 998.8129  | 1005.4882 |
| H  | -2.63033 | 6.56230  | 3.66547  | 1015.8707 | 1040.2470 | 1044.1647 |
| H  | -3.82820 | 7.08059  | 2.45883  | 1050.9382 | 1054.6679 | 1056.7312 |
| H  | -4.16832 | 4.67594  | 1.78350  | 1060.2112 | 1066.8030 | 1083.7195 |
| H  | -3.02026 | 4.17958  | 3.02687  | 1103.7556 | 1108.9563 | 1110.1891 |
| H  | -1.76021 | 7.06556  | 1.68832  | 1114.1299 | 1124.8877 | 1128.5147 |
| H  | -0.65294 | 6.30392  | 0.59376  | 1155.3582 | 1161.1819 | 1167.4967 |
| H  | -5.69996 | -3.98261 | 2.97764  | 1168.7766 | 1178.0536 | 1182.8435 |
| H  | -4.52313 | -5.14796 | 2.35217  | 1185.4785 | 1192.7324 | 1206.1080 |
| H  | -4.06135 | -3.45278 | 2.54969  | 1207.1024 | 1208.0903 | 1213.5977 |
| H  | -5.76603 | -2.82526 | 0.75540  | 1219.8646 | 1231.2903 | 1235.7491 |
| H  | -6.16272 | -4.51655 | 0.57320  | 1245.1753 | 1253.3770 | 1257.0832 |
| H  | -6.10033 | -5.08838 | -1.92353 | 1266.5944 | 1272.8200 | 1277.1608 |
| H  | -4.67417 | -4.57423 | -2.83149 | 1282.5114 | 1285.0671 | 1289.0408 |
| H  | -5.00006 | -6.30189 | -2.59397 | 1292.1442 | 1311.9524 | 1313.0062 |
| H  | -4.63539 | -6.04443 | -0.12890 | 1320.5863 | 1326.0367 | 1331.5894 |
| H  | -3.20032 | -5.57524 | -1.00550 | 1335.0113 | 1337.1102 | 1347.6623 |
| C  | 1.44123  | -0.14265 | -2.37793 | 1353.3256 | 1375.8059 | 1379.9363 |
| N  | 0.67732  | -0.08428 | -1.26617 | 1384.8386 | 1391.6826 | 1396.8982 |
| N  | 1.27515  | -0.41437 | -0.08833 | 1402.3991 | 1403.1132 | 1405.6031 |
| O  | 2.66483  | -0.46775 | -2.35160 | 1406.6558 | 1412.8420 | 1418.0666 |
| C  | 0.60673  | -0.47678 | 1.01942  | 1423.6442 | 1428.0219 | 1428.6624 |
| C  | 2.03685  | -1.78818 | 4.81456  | 1433.6480 | 1439.4993 | 1445.3016 |
| C  | 2.85416  | -2.00145 | 3.69039  | 1450.6615 | 1470.4747 | 1485.2986 |
| C  | 2.41750  | -1.55955 | 2.45985  | 1499.0221 | 1500.7654 | 1504.3466 |
| C  | 1.19024  | -0.89821 | 2.26948  | 1504.6355 | 1506.4551 | 1506.4768 |
| C  | 0.39991  | -0.69771 | 3.43828  | 1509.1173 | 1509.6294 | 1513.1183 |
| C  | 0.81337  | -1.13198 | 4.68596  | 1516.2081 | 1516.7844 | 1519.6639 |
| H  | 3.81361  | -2.49994 | 3.79676  | 1520.1329 | 1526.2339 | 1533.3856 |
| H  | 0.21050  | -0.97431 | 5.57360  | 1536.6932 | 1539.0791 | 1540.0728 |
| O  | 3.24246  | -1.80677 | 1.35277  | 1540.5972 | 1546.8657 | 1547.6000 |
| H  | -2.67532 | 1.08287  | -3.55197 | 1583.7880 | 1601.4623 | 1604.6208 |
| H  | -0.44363 | -0.20493 | 1.05202  | 1619.0801 | 1656.0310 | 1661.5015 |
| H  | -2.51181 | 6.16403  | -1.15385 | 1677.8957 | 1683.4340 | 1700.0324 |
| H  | -3.59829 | 6.96976  | -0.01574 | 1701.1755 | 1710.8657 | 1722.6667 |
| H  | -2.19272 | 7.83517  | -0.65444 | 1737.8391 | 3034.3713 | 3070.5850 |
| H  | -0.99583 | -2.18479 | -2.69985 | 3072.4703 | 3082.2473 | 3084.3620 |
| Zn | 3.26150  | -0.77428 | -0.47885 | 3086.3000 | 3088.4679 | 3099.1856 |
| O  | 5.17707  | -0.30931 | -0.53316 | 3099.9594 | 3110.7180 | 3116.1587 |
| H  | 3.89061  | -2.48679 | 1.58784  | 3120.0948 | 3123.9693 | 3127.5107 |
| C  | 5.79195  | 0.16787  | -1.78666 | 3138.5296 | 3147.0692 | 3153.9003 |
| C  | 6.12974  | -0.21265 | 0.57452  | 3162.1226 | 3166.8785 | 3167.1244 |
| C  | 7.27310  | 0.23402  | -1.46274 | 3168.0173 | 3169.0381 | 3169.5703 |
| C  | 7.26955  | 0.62528  | 0.01834  | 3171.7538 | 3176.0163 | 3179.4541 |
| H  | 5.36492  | 1.15012  | -2.00433 | 3182.1521 | 3184.9649 | 3187.6660 |
| H  | 5.52054  | -0.53854 | -2.57205 | 3195.7958 | 3206.5068 | 3219.2299 |
| H  | 7.78962  | 0.96102  | -2.09056 | 3226.2941 | 3228.3737 | 3232.7323 |

|   |          |          |          |           |           |           |
|---|----------|----------|----------|-----------|-----------|-----------|
| H | 7.74277  | -0.74273 | -1.60625 | 3241.8717 | 3255.9903 | 3259.3254 |
| H | 8.21315  | 0.40666  | 0.51957  | 3267.0153 | 3287.8935 | 3288.4577 |
| H | 7.05276  | 1.69022  | 0.13711  | 3827.9071 | 3878.0097 | 3879.2294 |
| H | 5.61326  | 0.23796  | 1.42469  |           |           |           |
| H | 6.45190  | -1.22912 | 0.82084  |           |           |           |
| O | 2.37833  | -2.18045 | 6.04016  |           |           |           |
| H | 3.22757  | -2.63891 | 6.06306  |           |           |           |
| O | -0.76351 | -0.06373 | 3.24280  |           |           |           |
| H | -1.27384 | 0.00297  | 4.05999  |           |           |           |

### Statistical Thermodynamic Analysis

Temperature=298.15 K

Pressure=1 atm

Zero-point correction= 0.785609

Electronic Energy = -2247.15209688

Internal Energy (E)= -2246.31979288

Enthalpy (H)= -2246.31884888

Gibbs Free Energy (G)=-2246.45006088

Gibbs Free Energy of Solvation=-2246.63768364

| St.Pt.                              | General Structure                                                                   | Ball & Stick model                                                                    |          |           |          |          |
|-------------------------------------|-------------------------------------------------------------------------------------|---------------------------------------------------------------------------------------|----------|-----------|----------|----------|
| <b>TS<sub>b</sub></b>               | 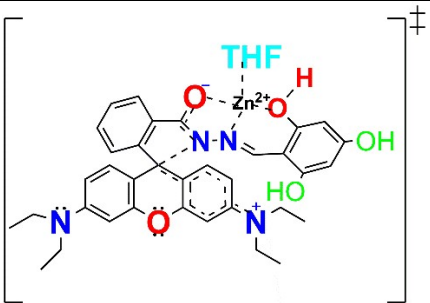 |  |          |           |          |          |
| <b><u>Cartesian co-ordinate</u></b> |                                                                                     | <b><u>Frequencies</u></b>                                                             |          |           |          |          |
|                                     | -----                                                                               |                                                                                       |          |           |          |          |
| Atoms                               | X                                                                                   | Y                                                                                     | Z        |           |          |          |
|                                     | -----                                                                               |                                                                                       |          |           |          |          |
| C                                   | -2.92543                                                                            | -2.81274                                                                              | -1.70092 | -345.5989 | 7.3281   | 13.0747  |
| C                                   | -2.08529                                                                            | -1.78733                                                                              | -2.00796 | 17.9675   | 20.4719  | 21.9480  |
| C                                   | -1.98337                                                                            | -0.62882                                                                              | -1.21555 | 24.2768   | 30.9127  | 31.9470  |
| C                                   | -2.79941                                                                            | -0.58640                                                                              | -0.08914 | 41.0025   | 50.3387  | 58.4324  |
| C                                   | -3.66207                                                                            | -1.60716                                                                              | 0.25154  | 61.5140   | 63.6763  | 69.5482  |
| C                                   | -3.76556                                                                            | -2.75566                                                                              | -0.54858 | 75.9286   | 83.9002  | 96.6635  |
| C                                   | -1.09958                                                                            | 0.49457                                                                               | -1.52987 | 99.3426   | 105.4539 | 113.4253 |
| C                                   | -2.14383                                                                            | 1.60846                                                                               | 0.41748  | 122.4830  | 124.1290 | 141.9053 |
| C                                   | -1.30971                                                                            | 1.67541                                                                               | -0.69109 | 154.4500  | 161.4603 | 167.5848 |
|                                     |                                                                                     |                                                                                       |          | 178.7531  | 181.8457 | 193.5614 |
|                                     |                                                                                     |                                                                                       |          | 198.7254  | 202.4422 | 212.0585 |
|                                     |                                                                                     |                                                                                       |          | 223.6017  | 229.2972 | 233.1729 |
|                                     |                                                                                     |                                                                                       |          | 235.3426  | 238.7870 | 240.0459 |
|                                     |                                                                                     |                                                                                       |          | 255.4586  | 258.0857 | 267.5431 |

|   |          |          |          |           |           |           |
|---|----------|----------|----------|-----------|-----------|-----------|
| C | -0.71944 | 2.92735  | -0.94341 | 274.9745  | 288.0189  | 290.4324  |
| H | -0.07980 | 3.04119  | -1.79998 | 307.2190  | 310.8354  | 323.0443  |
| C | -0.93582 | 4.01151  | -0.15048 | 336.0796  | 356.0529  | 359.0046  |
| C | -1.78548 | 3.93223  | 0.99423  | 369.4182  | 381.3838  | 398.5348  |
| C | -2.38831 | 2.69080  | 1.24045  | 401.2160  | 408.7416  | 411.9754  |
| H | -2.96984 | -3.65130 | -2.36350 | 426.8531  | 432.3700  | 441.9104  |
| H | -4.24640 | -1.47475 | 1.13729  | 446.9144  | 459.5810  | 465.5431  |
| H | -0.46501 | 4.93319  | -0.41784 | 481.7133  | 485.9766  | 494.3559  |
| H | -3.07886 | 2.53726  | 2.04104  | 508.5756  | 523.9454  | 536.1022  |
| C | -0.79861 | 0.73151  | -2.99435 | 538.2365  | 554.2671  | 564.8216  |
| C | -1.74050 | 1.20592  | -3.88735 | 576.2720  | 588.1911  | 589.5365  |
| C | 0.48373  | 0.44291  | -3.43480 | 616.3475  | 625.5331  | 639.0222  |
| C | -1.37097 | 1.38062  | -5.21423 | 645.6118  | 651.7849  | 658.9788  |
| C | 0.85901  | 0.61329  | -4.75762 | 666.5004  | 687.8788  | 689.5321  |
| C | -0.08417 | 1.08735  | -5.65097 | 711.6963  | 717.9293  | 723.7671  |
| H | -2.09620 | 1.74868  | -5.91699 | 734.5661  | 741.2362  | 751.2399  |
| H | 0.17484  | 1.22950  | -6.68369 | 756.3435  | 783.5779  | 788.8872  |
| H | 1.85879  | 0.37862  | -5.07233 | 794.6272  | 802.9204  | 813.2725  |
| N | -4.62149 | -3.75883 | -0.25049 | 824.2672  | 851.4575  | 852.3909  |
| C | -5.58857 | -3.65072 | 0.83911  | 857.7032  | 858.1887  | 884.6125  |
| C | -4.67822 | -4.99787 | -1.02468 | 889.3833  | 894.0091  | 901.4063  |
| C | -5.04447 | -4.11670 | 2.18723  | 909.5860  | 911.7909  | 919.7023  |
| C | -5.61088 | -4.92685 | -2.23111 | 921.7570  | 924.6078  | 935.5244  |
| N | -1.99360 | 5.00432  | 1.80577  | 937.2422  | 939.4175  | 941.1042  |
| C | -2.94676 | 4.86103  | 2.91314  | 947.1340  | 988.3715  | 991.6577  |
| C | -1.60396 | 6.34760  | 1.37442  | 993.0646  | 998.4806  | 1007.9775 |
| C | -2.98070 | 6.01544  | 3.90670  | 1010.9649 | 1022.5610 | 1027.1574 |
| C | -2.56829 | 6.98305  | 0.37515  | 1036.7488 | 1046.2740 | 1071.5017 |
| O | -2.78254 | 0.46767  | 0.75413  | 1097.7389 | 1099.0191 | 1100.8732 |
| H | -3.64923 | 5.73908  | 4.71442  | 1104.2546 | 1105.9006 | 1111.4753 |
| H | -2.00366 | 6.20568  | 4.33679  | 1122.0779 | 1122.6727 | 1129.3654 |
| H | -3.35943 | 6.93441  | 3.47678  | 1129.9092 | 1145.7864 | 1147.7374 |
| H | -3.94953 | 4.69902  | 2.52147  | 1173.8911 | 1185.4583 | 1189.5424 |
| H | -2.67311 | 3.97113  | 3.46665  | 1190.5063 | 1198.7966 | 1204.7324 |
| H | -1.52808 | 6.96767  | 2.25199  | 1211.5219 | 1234.8638 | 1235.3377 |
| H | -0.60244 | 6.31228  | 0.96997  | 1243.0591 | 1247.9425 | 1255.8611 |
| H | -5.81235 | -4.03261 | 2.94926  | 1266.7848 | 1272.0562 | 1284.5863 |
| H | -4.73125 | -5.15432 | 2.14122  | 1292.9355 | 1295.3302 | 1299.0967 |
| H | -4.19071 | -3.52426 | 2.49859  | 1306.8744 | 1311.0930 | 1317.1084 |
| H | -5.95421 | -2.63409 | 0.90110  | 1320.1731 | 1324.8015 | 1332.7654 |
| H | -6.44467 | -4.25502 | 0.56765  | 1336.5116 | 1345.1450 | 1364.3294 |
| H | -6.62501 | -4.69436 | -1.92497 | 1372.0832 | 1373.0339 | 1376.0378 |
| H | -5.29531 | -4.16669 | -2.93705 | 1384.2344 | 1386.6730 | 1398.4411 |
| H | -5.62808 | -5.88202 | -2.74559 | 1401.0705 | 1406.9346 | 1416.7496 |
| H | -5.01567 | -5.77556 | -0.35104 | 1425.3283 | 1436.2683 | 1447.5063 |
| H | -3.67931 | -5.28542 | -1.32560 | 1448.7985 | 1459.2324 | 1459.3027 |
| C | 1.32996  | -0.03590 | -2.34506 | 1468.6454 | 1478.9380 | 1493.1883 |
| N | 0.65424  | -0.07049 | -1.22688 | 1499.6230 | 1507.9461 | 1516.3936 |
| N | 1.36886  | -0.51574 | -0.14242 | 1517.6372 | 1522.0818 | 1535.6903 |
| O | 2.54542  | -0.36249 | -2.46193 | 1538.8853 | 1541.0619 | 1542.4871 |
| C | 0.78538  | -0.76201 | 0.95869  | 1555.2133 | 1555.9974 | 1558.9262 |
| C | 2.48643  | -2.55944 | 4.42846  | 1565.2942 | 1570.2346 | 1590.4960 |
| C | 3.18025  | -2.66080 | 3.21851  | 1611.7004 | 1615.8527 | 1618.4526 |
| C | 2.65502  | -2.05724 | 2.10307  | 1618.8886 | 1619.2350 | 1621.7920 |



| I                            | 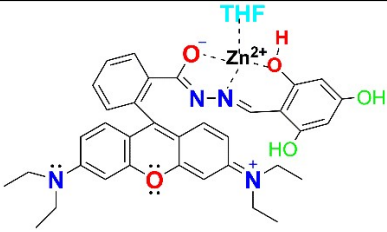 |  |          |                    |           |           |
|------------------------------|-----------------------------------------------------------------------------------|-------------------------------------------------------------------------------------|----------|--------------------|-----------|-----------|
| <u>Cartesian co-ordinate</u> |                                                                                   |                                                                                     |          | <u>Frequencies</u> |           |           |
| Atoms                        | X                                                                                 | Y                                                                                   | Z        |                    |           |           |
| -----                        |                                                                                   |                                                                                     |          | 2.8681             | 10.0930   | 16.6628   |
|                              |                                                                                   |                                                                                     |          | 17.5596            | 19.7651   | 27.3591   |
|                              |                                                                                   |                                                                                     |          | 29.0666            | 33.0586   | 36.3834   |
| -----                        |                                                                                   |                                                                                     |          | 44.6191            | 54.1157   | 57.0117   |
| C                            | -2.98072                                                                          | -2.97935                                                                            | -1.85715 | 61.0563            | 67.5497   | 69.9004   |
| C                            | -2.36661                                                                          | -1.80626                                                                            | -2.12443 | 80.5953            | 92.2265   | 98.3466   |
| C                            | -2.49126                                                                          | -0.67404                                                                            | -1.27258 | 102.6904           | 107.5761  | 113.2596  |
| C                            | -3.28684                                                                          | -0.85655                                                                            | -0.12138 | 115.9766           | 129.4336  | 141.1970  |
| C                            | -3.92013                                                                          | -2.03483                                                                            | 0.17723  | 154.2284           | 160.7922  | 166.6841  |
| C                            | -3.80485                                                                          | -3.14268                                                                            | -0.68819 | 174.2573           | 177.1115  | 193.5662  |
| C                            | -1.90266                                                                          | 0.57440                                                                             | -1.50483 | 197.6546           | 206.8877  | 211.1560  |
| C                            | -2.93839                                                                          | 1.36670                                                                             | 0.53862  | 225.3759           | 230.2920  | 233.2714  |
| C                            | -2.14154                                                                          | 1.61513                                                                             | -0.59550 | 234.2143           | 239.9723  | 249.8518  |
| C                            | -1.65604                                                                          | 2.94376                                                                             | -0.72867 | 254.1620           | 265.6988  | 266.9544  |
| H                            | -1.05274                                                                          | 3.19118                                                                             | -1.58138 | 281.1266           | 294.8121  | 295.2184  |
| C                            | -1.94135                                                                          | 3.90920                                                                             | 0.17304  | 308.5605           | 320.6070  | 324.6456  |
| C                            | -2.75315                                                                          | 3.63920                                                                             | 1.33082  | 346.0232           | 355.4601  | 362.5640  |
| C                            | -3.24368                                                                          | 2.32536                                                                             | 1.47203  | 365.6194           | 376.9073  | 396.0057  |
| H                            | -2.86879                                                                          | -3.78543                                                                            | -2.55068 | 402.0402           | 406.1382  | 422.7519  |
| H                            | -4.49588                                                                          | -2.07193                                                                            | 1.07702  | 426.2476           | 430.6232  | 439.7452  |
| H                            | -1.56055                                                                          | 4.89226                                                                             | -0.00110 | 440.4386           | 455.6927  | 465.7318  |
| H                            | -3.88026                                                                          | 2.03467                                                                             | 2.27875  | 480.9010           | 489.9806  | 504.7942  |
| C                            | -1.18456                                                                          | 0.84433                                                                             | -2.79470 | 515.2517           | 525.6560  | 538.6406  |
| C                            | -2.00353                                                                          | 1.25892                                                                             | -3.83739 | 543.8596           | 556.6655  | 565.5980  |
| C                            | 0.19515                                                                           | 0.71326                                                                             | -3.01377 | 583.9274           | 594.4479  | 617.1840  |
| C                            | -1.48375                                                                          | 1.54383                                                                             | -5.08935 | 619.5406           | 631.5227  | 642.4977  |
| C                            | 0.69776                                                                           | 1.00289                                                                             | -4.27956 | 647.0463           | 649.4227  | 656.8415  |
| C                            | -0.12661                                                                          | 1.41388                                                                             | -5.31104 | 679.6507           | 689.2307  | 709.6997  |
| H                            | -2.13942                                                                          | 1.86231                                                                             | -5.87909 | 716.4801           | 726.1900  | 731.3827  |
| H                            | 0.29015                                                                           | 1.62879                                                                             | -6.27782 | 732.0955           | 736.9033  | 741.7015  |
| H                            | 1.75069                                                                           | 0.89757                                                                             | -4.44567 | 753.3478           | 782.9691  | 790.2856  |
| N                            | -4.43544                                                                          | -4.29798                                                                            | -0.44322 | 791.0065           | 801.6899  | 815.1456  |
| C                            | -5.37692                                                                          | -4.44963                                                                            | 0.66922  | 837.8722           | 850.1120  | 852.1001  |
| C                            | -4.26410                                                                          | -5.48950                                                                            | -1.28098 | 858.1294           | 859.6532  | 884.7228  |
| C                            | -4.70990                                                                          | -4.87824                                                                            | 1.97309  | 887.1294           | 890.8264  | 899.3036  |
| C                            | -5.22166                                                                          | -5.54078                                                                            | -2.46790 | 909.3055           | 912.8081  | 914.7994  |
| N                            | -3.02994                                                                          | 4.59596                                                                             | 2.23469  | 922.8519           | 926.7875  | 927.1291  |
| C                            | -3.92961                                                                          | 4.26570                                                                             | 3.35431  | 934.5858           | 936.2687  | 942.5158  |
| C                            | -2.66097                                                                          | 5.99523                                                                             | 1.99365  | 943.4379           | 988.6333  | 989.0913  |
| C                            | -4.07639                                                                          | 5.33354                                                                             | 4.43014  | 991.6750           | 998.1220  | 1007.6873 |
| C                            | -3.63372                                                                          | 6.73599                                                                             | 1.07960  | 1009.8374          | 1019.7703 | 1021.6099 |



|    |          |          |          |           |           |           |
|----|----------|----------|----------|-----------|-----------|-----------|
| O  | -3.45806 | 0.14915  | 0.74593  | 1024.2416 | 1046.5528 | 1069.2207 |
| H  | -4.72758 | 4.93433  | 5.19950  | 1099.7641 | 1102.1841 | 1103.5529 |
| H  | -3.12840 | 5.57524  | 4.89681  | 1108.6092 | 1109.7425 | 1110.3602 |
| H  | -4.53159 | 6.24515  | 4.06360  | 1125.9672 | 1128.4778 | 1132.6584 |
| H  | -4.91327 | 4.02360  | 2.96012  | 1144.0901 | 1145.8770 | 1153.3265 |
| H  | -3.54516 | 3.37351  | 3.83316  | 1175.2548 | 1185.1302 | 1186.6759 |
| H  | -2.60680 | 6.49086  | 2.94775  | 1188.2182 | 1191.4764 | 1200.3599 |
| H  | -1.65598 | 6.03128  | 1.59893  | 1210.5091 | 1223.0607 | 1232.5084 |
| H  | -5.45801 | -4.99703 | 2.74956  | 1237.2941 | 1242.7936 | 1256.6495 |
| H  | -4.19781 | -5.82703 | 1.85449  | 1262.5331 | 1267.9286 | 1275.0285 |
| H  | -3.98424 | -4.14604 | 2.30979  | 1279.5922 | 1291.3643 | 1300.6209 |
| H  | -5.93253 | -3.53121 | 0.79963  | 1310.7820 | 1311.6101 | 1317.3499 |
| H  | -6.10195 | -5.19450 | 0.36893  | 1318.3943 | 1326.5011 | 1328.9239 |
| H  | -6.25408 | -5.52133 | -2.13680 | 1331.7110 | 1337.1475 | 1339.0401 |
| H  | -5.07198 | -4.70324 | -3.13992 | 1373.3402 | 1376.6828 | 1386.2165 |
| H  | -5.06760 | -6.45708 | -3.02766 | 1390.0755 | 1396.5426 | 1403.2483 |
| H  | -4.42943 | -6.34622 | -0.64080 | 1404.1463 | 1406.8251 | 1422.1891 |
| H  | -3.23559 | -5.56031 | -1.60680 | 1429.4881 | 1448.6992 | 1455.1795 |
| C  | 1.18011  | 0.27617  | -1.97945 | 1458.8087 | 1466.8541 | 1467.8917 |
| N  | 0.74784  | -0.03257 | -0.80470 | 1492.1090 | 1498.8967 | 1506.0698 |
| N  | 1.77174  | -0.43606 | 0.03580  | 1507.8812 | 1513.4614 | 1516.9566 |
| O  | 2.41652  | 0.23553  | -2.34364 | 1518.1648 | 1524.0913 | 1529.1542 |
| C  | 1.44054  | -0.96323 | 1.13861  | 1541.1071 | 1543.5157 | 1543.7012 |
| C  | 4.01111  | -2.78289 | 4.01994  | 1547.0251 | 1556.1898 | 1556.9476 |
| C  | 4.50288  | -2.56138 | 2.73320  | 1559.9593 | 1568.0857 | 1577.3446 |
| C  | 3.68917  | -1.94940 | 1.80775  | 1600.4074 | 1616.2374 | 1617.1629 |
| C  | 2.38653  | -1.53231 | 2.09428  | 1618.5562 | 1619.5100 | 1623.1073 |
| C  | 1.93475  | -1.77707 | 3.41014  | 1623.8397 | 1625.4516 | 1627.8576 |
| C  | 2.72705  | -2.38451 | 4.35936  | 1628.7589 | 1632.8691 | 1634.2524 |
| H  | 5.50325  | -2.86043 | 2.47278  | 1635.0315 | 1642.4963 | 1650.7324 |
| H  | 2.37310  | -2.56050 | 5.35796  | 1656.1717 | 1658.0770 | 1664.4289 |
| O  | 4.19877  | -1.75580 | 0.53800  | 1666.1939 | 1668.1564 | 1674.9149 |
| H  | -3.06060 | 1.35970  | -3.66810 | 1680.9851 | 1693.7304 | 1706.1141 |
| H  | 0.39619  | -1.01239 | 1.39212  | 1724.0477 | 1734.4941 | 1746.9238 |
| H  | -3.69346 | 6.27597  | 0.09936  | 1766.4391 | 1773.8092 | 1778.4751 |
| H  | -4.63239 | 6.74911  | 1.50222  | 1802.3538 | 1822.9956 | 1827.4308 |
| H  | -3.31127 | 7.76394  | 0.95148  | 1882.5474 | 3187.4015 | 3195.1904 |
| H  | -1.77551 | -1.71980 | -3.01622 | 3195.9731 | 3197.6668 | 3204.7206 |
| Zn | 3.56647  | -0.20629 | -0.86748 | 3228.6438 | 3231.8300 | 3237.1562 |
| O  | 5.32553  | 0.71090  | -1.06902 | 3240.8322 | 3243.2355 | 3248.8736 |
| H  | 4.93739  | -2.33058 | 0.39161  | 3258.7743 | 3261.6751 | 3262.2959 |
| C  | 5.62459  | 1.45920  | -2.28906 | 3265.2996 | 3267.9138 | 3272.2376 |
| C  | 6.35581  | 0.91599  | -0.06726 | 3274.0776 | 3274.5296 | 3279.2471 |
| C  | 7.06357  | 1.90923  | -2.10856 | 3288.6284 | 3289.1746 | 3289.7813 |
| C  | 7.17278  | 2.08432  | -0.59354 | 3294.2251 | 3295.9551 | 3305.4426 |
| H  | 4.93077  | 2.28663  | -2.33974 | 3326.2877 | 3340.2668 | 3346.6647 |
| H  | 5.46196  | 0.79830  | -3.12704 | 3359.0268 | 3371.7649 | 3377.1071 |
| H  | 7.26821  | 2.81952  | -2.65627 | 3382.5731 | 3386.4928 | 3388.9423 |
| H  | 7.74821  | 1.14371  | -2.45673 | 3390.2892 | 3420.9777 | 3433.0653 |
| H  | 8.19254  | 2.05454  | -0.23331 | 3436.7311 | 3440.3474 | 3447.5925 |
| H  | 6.73037  | 3.02450  | -0.28323 | 4134.6361 | 4169.8221 | 4178.8927 |
| H  | 5.87171  | 1.10505  | 0.88055  |           |           |           |
| H  | 6.93968  | 0.00645  | -0.00432 |           |           |           |
| O  | 4.72928  | -3.36338 | 4.96776  |           |           |           |



|   |          |          |          |           |           |           |
|---|----------|----------|----------|-----------|-----------|-----------|
| H | -4.27366 | 2.29761  | 1.04943  | 516.2932  | 528.3182  | 539.9329  |
| C | -1.14317 | -0.82616 | -2.80449 | 543.6870  | 555.9999  | 565.4756  |
| C | -1.94613 | -1.21035 | -3.87128 | 583.7493  | 594.5109  | 617.1833  |
| C | 0.24264  | -0.71547 | -2.99147 | 619.6829  | 630.7090  | 642.5563  |
| C | -1.40392 | -1.48265 | -5.11640 | 646.7531  | 648.5992  | 657.5205  |
| C | 0.76753  | -0.98763 | -4.25184 | 679.6098  | 691.0694  | 710.3749  |
| C | -0.04054 | -1.36908 | -5.30725 | 718.2092  | 726.2399  | 731.2068  |
| H | -2.04730 | -1.77617 | -5.92565 | 732.9386  | 736.9496  | 740.6551  |
| H | 0.39344  | -1.57385 | -6.26865 | 753.2513  | 782.8566  | 790.6658  |
| H | 1.82495  | -0.89346 | -4.39476 | 791.2389  | 801.7459  | 815.2016  |
| N | -3.74411 | -4.54683 | 1.87928  | 837.4563  | 850.9904  | 852.2035  |
| C | -4.72217 | -4.26900 | 2.93429  | 858.1459  | 859.8374  | 884.5117  |
| C | -3.34892 | -5.95347 | 1.75132  | 891.4340  | 899.0390  | 906.3812  |
| C | -4.08378 | -3.88084 | 4.26488  | 909.6908  | 911.4474  | 914.8489  |
| C | -4.21070 | -6.73959 | 0.76764  | 919.4384  | 925.1249  | 926.8699  |
| N | -3.80428 | 4.59317  | -0.29154 | 927.4523  | 936.2216  | 940.5423  |
| C | -4.71122 | 4.72953  | 0.86177  | 942.4750  | 988.5370  | 988.8746  |
| C | -3.63463 | 5.72200  | -1.21320 | 991.0517  | 998.1339  | 1007.7292 |
| C | -5.07280 | 6.15389  | 1.26151  | 1009.7230 | 1019.5057 | 1021.7237 |
| C | -4.65348 | 5.74298  | -2.34985 | 1024.2658 | 1046.6073 | 1069.2518 |
| O | -3.49316 | -0.00910 | 0.65897  | 1099.6344 | 1104.0026 | 1104.5027 |
| H | -5.70190 | 6.09612  | 2.14256  | 1107.8207 | 1110.1267 | 1110.7594 |
| H | -4.19801 | 6.73879  | 1.52149  | 1126.4913 | 1128.1507 | 1130.9991 |
| H | -5.63391 | 6.67903  | 0.49867  | 1143.5245 | 1145.2376 | 1153.2604 |
| H | -5.62503 | 4.17515  | 0.66348  | 1175.1536 | 1185.0872 | 1186.9639 |
| H | -4.23107 | 4.26553  | 1.71458  | 1187.5942 | 1191.3711 | 1200.6062 |
| H | -3.70863 | 6.62988  | -0.63939 | 1210.5936 | 1222.8329 | 1232.7415 |
| H | -2.62555 | 5.71286  | -1.59886 | 1238.0218 | 1243.0043 | 1256.5108 |
| H | -4.85445 | -3.71180 | 5.00934  | 1262.5913 | 1268.4008 | 1275.0562 |
| H | -3.43416 | -4.66930 | 4.62933  | 1279.6199 | 1291.4075 | 1308.0967 |
| H | -3.49343 | -2.97558 | 4.17509  | 1310.1696 | 1311.5565 | 1317.7034 |
| H | -5.41124 | -3.50743 | 2.59613  | 1318.5967 | 1322.8067 | 1328.9539 |
| H | -5.31201 | -5.16711 | 3.06143  | 1331.5167 | 1337.1776 | 1339.2101 |
| H | -5.25430 | -6.71985 | 1.06158  | 1373.4565 | 1377.5880 | 1386.3677 |
| H | -4.14030 | -6.33751 | -0.23679 | 1389.9793 | 1393.3661 | 1403.2060 |
| H | -3.89047 | -7.77566 | 0.74194  | 1404.1551 | 1406.5968 | 1422.3161 |
| H | -3.42987 | -6.39021 | 2.73812  | 1429.1564 | 1448.4200 | 1455.1953 |
| H | -2.30213 | -6.01473 | 1.48792  | 1458.7898 | 1466.8030 | 1469.7817 |
| C | 1.21345  | -0.33587 | -1.92172 | 1492.0409 | 1498.9537 | 1506.6659 |
| N | 0.79374  | -0.26225 | -0.70489 | 1508.2139 | 1516.5051 | 1517.5164 |
| N | 1.80174  | 0.10990  | 0.16892  | 1519.2287 | 1524.4968 | 1529.0290 |
| O | 2.42766  | -0.11915 | -2.29804 | 1541.7537 | 1543.4282 | 1544.2792 |
| C | 1.46077  | 0.42130  | 1.34830  | 1547.1478 | 1556.2216 | 1556.9846 |
| C | 3.97007  | 1.99491  | 4.42344  | 1559.9699 | 1568.0023 | 1577.2893 |
| C | 4.42948  | 2.02133  | 3.10496  | 1600.5859 | 1616.2697 | 1617.1687 |
| C | 3.64112  | 1.49653  | 2.11700  | 1618.5648 | 1619.3776 | 1623.1417 |
| C | 2.38252  | 0.92440  | 2.36219  | 1623.8104 | 1625.4797 | 1627.8531 |
| C | 1.95956  | 0.92311  | 3.70399  | 1628.9684 | 1632.8521 | 1634.3096 |
| C | 2.73644  | 1.44263  | 4.72552  | 1636.4872 | 1642.3962 | 1653.7735 |
| H | 5.39166  | 2.45305  | 2.89944  | 1656.3143 | 1657.8593 | 1666.1078 |
| H | 2.38286  | 1.41639  | 5.74123  | 1667.0590 | 1668.1803 | 1675.1123 |
| O | 4.11710  | 1.55053  | 0.82157  | 1680.9790 | 1693.5454 | 1705.4723 |
| H | -3.00878 | -1.29046 | -3.72810 | 1723.5419 | 1734.7995 | 1747.2606 |
| H | 0.42632  | 0.32373  | 1.62737  | 1766.4255 | 1777.9796 | 1781.2690 |

|    |          |          |          |           |           |           |
|----|----------|----------|----------|-----------|-----------|-----------|
| H  | -4.58870 | 4.85152  | -2.96396 | 1802.2466 | 1820.8643 | 1825.5049 |
| H  | -5.66531 | 5.80907  | -1.96514 | 1880.7736 | 3186.8560 | 3195.1105 |
| H  | -4.48055 | 6.60472  | -2.98586 | 3196.0328 | 3197.6671 | 3204.6278 |
| H  | -1.32522 | -3.21482 | -1.68654 | 3228.2272 | 3231.4552 | 3240.5199 |
| Zn | 3.58281  | 0.18866  | -0.79020 | 3241.0367 | 3242.6546 | 3249.0616 |
| O  | 5.40875  | -0.53308 | -1.14660 | 3251.3885 | 3261.7283 | 3262.3839 |
| C  | 6.36072  | -1.04538 | -0.17557 | 3265.3880 | 3268.1251 | 3272.1110 |
| C  | 5.81988  | -0.86740 | -2.50863 | 3274.1214 | 3274.3087 | 3279.4293 |
| C  | 7.55802  | -1.47974 | -1.00552 | 3288.6878 | 3289.4631 | 3290.5045 |
| C  | 6.91330  | -1.90452 | -2.32538 | 3295.5294 | 3296.1624 | 3309.6873 |
| H  | 5.89394  | -1.87672 | 0.33746  | 3327.7755 | 3339.8434 | 3353.2792 |
| H  | 6.57422  | -0.25682 | 0.53133  | 3359.3495 | 3371.8729 | 3374.3218 |
| H  | 8.10910  | -2.27681 | -0.52433 | 3376.1635 | 3386.5636 | 3389.3621 |
| H  | 8.23393  | -0.64608 | -1.16071 | 3391.6351 | 3420.4203 | 3433.3136 |
| H  | 7.60739  | -1.90409 | -3.15531 | 3436.8716 | 3440.5849 | 3447.0995 |
| H  | 6.48481  | -2.89728 | -2.24158 | 4128.9829 | 4170.4498 | 4175.1754 |
| H  | 4.94625  | -1.21710 | -3.03711 |           |           |           |
| H  | 6.18600  | 0.04228  | -2.96585 |           |           |           |
| H  | 4.82481  | 2.17814  | 0.76365  |           |           |           |
| O  | 4.77672  | 2.51311  | 5.33490  |           |           |           |
| O  | 0.76244  | 0.38909  | 3.94734  |           |           |           |
| H  | 4.42467  | 2.47521  | 6.21108  |           |           |           |
| H  | 0.52346  | 0.44194  | 4.85969  |           |           |           |

#### Statistical Thermodynamic Analysis

Temperature=298.15 K

Pressure=1 atm

Zero-point correction= 0.831327

Electronic Energy = -2232.6811972

Internal Energy (E)= -2231.80384672

Enthalpy (H)= -2231.80290272

Gibbs Free Energy (G)=-2231.93665172

Gibbs Free Energy of Solvation=-2232.10914876

| St.Pt.                | General Structure                                                                   | Ball & Stick model                                                                    |
|-----------------------|-------------------------------------------------------------------------------------|---------------------------------------------------------------------------------------|
| <b>TS<sub>a</sub></b> | 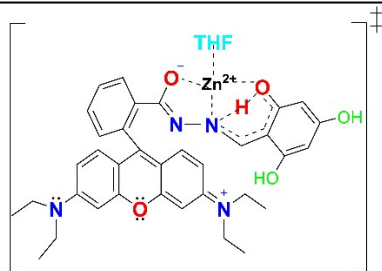 |  |
|                       | <b><u>Cartesian co-ordinate</u></b>                                                 | <b><u>Frequencies</u></b>                                                             |

| ----- |          |          |          | -1093.0775 | 6.1063    | 10.0489   |
|-------|----------|----------|----------|------------|-----------|-----------|
| Atoms | X        | Y        | Z        | 15.8373    | 17.2023   | 20.3275   |
| ----- |          |          |          | 26.7752    | 28.5149   | 32.3007   |
|       |          |          |          | 37.2271    | 46.0850   | 56.2069   |
|       |          |          |          | 56.6555    | 62.3208   | 65.5822   |
| C     | 3.49303  | -3.05152 | 1.44758  | 72.5860    | 81.2328   | 85.3975   |
| C     | 2.74704  | -1.99219 | 1.82825  | 99.2442    | 104.9152  | 109.4599  |
| C     | 2.78800  | -0.74819 | 1.13841  | 112.6192   | 121.1274  | 125.2963  |
| C     | 3.63686  | -0.70050 | 0.01074  | 129.7496   | 148.7194  | 161.9375  |
| C     | 4.40369  | -1.75873 | -0.40029 | 163.1608   | 171.7245  | 183.8985  |
| C     | 4.37653  | -2.97559 | 0.31278  | 198.2150   | 201.0965  | 208.8800  |
| C     | 2.05688  | 0.39087  | 1.49028  | 222.7144   | 225.1072  | 233.9624  |
| C     | 3.06053  | 1.53522  | -0.39736 | 234.6006   | 238.4736  | 249.5766  |
| C     | 2.20723  | 1.55706  | 0.72327  | 251.3743   | 256.4927  | 265.4651  |
| C     | 1.58836  | 2.80627  | 0.99985  | 279.3664   | 283.5900  | 299.6701  |
| H     | 0.95099  | 2.89077  | 1.85955  | 302.6857   | 320.5618  | 322.6821  |
| C     | 1.79046  | 3.89805  | 0.22917  | 339.4512   | 348.9039  | 359.0826  |
| C     | 2.64724  | 3.85357  | -0.92728 | 365.1630   | 374.5313  | 381.4999  |
| C     | 3.28296  | 2.62587  | -1.19989 | 396.9821   | 402.2507  | 424.9650  |
| H     | 3.43595  | -3.95107 | 2.02279  | 431.3038   | 436.1946  | 439.7794  |
| H     | 5.00731  | -1.62196 | -1.27165 | 446.6980   | 457.9208  | 488.7116  |
| H     | 1.31080  | 4.81071  | 0.50992  | 489.7039   | 503.5908  | 505.4092  |
| H     | 3.96812  | 2.50245  | -2.00971 | 516.3673   | 530.1781  | 539.2662  |
| C     | 1.25224  | 0.41692  | 2.75627  | 554.2704   | 565.2608  | 567.7140  |
| C     | 1.98389  | 0.59713  | 3.92366  | 594.3309   | 606.7271  | 615.6763  |
| C     | -0.14547 | 0.32810  | 2.82942  | 629.2065   | 642.6438  | 647.1850  |
| C     | 1.35738  | 0.69182  | 5.15524  | 654.9689   | 669.7884  | 679.8314  |
| C     | -0.75793 | 0.43411  | 4.07418  | 689.2077   | 710.1903  | 715.6820  |
| C     | -0.01993 | 0.61001  | 5.23038  | 726.0633   | 728.2409  | 729.8417  |
| H     | 1.94555  | 0.83323  | 6.04345  | 736.6977   | 744.0987  | 751.6716  |
| H     | -0.51793 | 0.68336  | 6.17969  | 759.7117   | 788.2208  | 790.6866  |
| H     | -1.82651 | 0.37386  | 4.12885  | 792.2670   | 805.7371  | 826.0260  |
| N     | 5.13608  | -4.01820 | -0.04255 | 836.8456   | 851.2557  | 852.1028  |
| C     | 6.12763  | -3.92770 | -1.11818 | 858.0325   | 859.8830  | 884.8364  |
| C     | 5.06222  | -5.32044 | 0.62812  | 889.6697   | 899.5393  | 904.1704  |
| C     | 5.55748  | -4.25134 | -2.49613 | 909.2434   | 913.3439  | 914.6259  |
| C     | 5.97255  | -5.42764 | 1.84798  | 923.0802   | 925.1390  | 927.5837  |
| N     | 2.83391  | 4.93287  | -1.70701 | 931.9178   | 934.5636  | 937.3179  |
| C     | 3.78069  | 4.83188  | -2.83241 | 942.6265   | 987.3066  | 987.7214  |
| C     | 2.31135  | 6.24750  | -1.31934 | 989.9179   | 997.5680  | 1004.0227 |
| C     | 3.81913  | 6.02292  | -3.78060 | 1007.7623  | 1017.9074 | 1019.8202 |
| C     | 3.18497  | 6.97717  | -0.30206 | 1024.3635  | 1047.3676 | 1069.3292 |
| O     | 3.72291  | 0.41702  | -0.72042 | 1096.7534  | 1099.0440 | 1102.8120 |
| H     | 4.51947  | 5.78608  | -4.57348 | 1105.0864  | 1110.0757 | 1110.6728 |
| H     | 2.85532  | 6.20901  | -4.24030 | 1114.4102  | 1129.9094 | 1143.4499 |
| H     | 4.16525  | 6.93248  | -3.30564 | 1144.2463  | 1149.5898 | 1156.5282 |
| H     | 4.78002  | 4.65838  | -2.44146 | 1175.1474  | 1185.0735 | 1186.7654 |
| H     | 3.50597  | 3.96176  | -3.41559 | 1191.1352  | 1193.4243 | 1210.3786 |
| H     | 2.21699  | 6.84117  | -2.21238 | 1217.8227  | 1227.7734 | 1232.5360 |
| H     | 1.30291  | 6.13058  | -0.94974 | 1242.2125  | 1243.8437 | 1256.2077 |
| H     | 6.34130  | -4.19150 | -3.24356 | 1262.1495  | 1266.3526 | 1275.9114 |
| H     | 5.14768  | -5.25531 | -2.52151 | 1285.7206  | 1291.9039 | 1310.3072 |
| H     | 4.76928  | -3.56085 | -2.77501 | 1310.6711  | 1316.4216 | 1316.6243 |
| H     | 6.58435  | -2.94774 | -1.10585 | 1319.4095  | 1327.3937 | 1329.6555 |

|    |          |          |          |           |           |           |
|----|----------|----------|----------|-----------|-----------|-----------|
| H  | 6.91789  | -4.62629 | -0.87698 | 1331.3407 | 1337.3705 | 1339.3168 |
| H  | 7.00877  | -5.25848 | 1.57690  | 1371.9269 | 1386.2424 | 1388.9170 |
| H  | 5.70607  | -4.70523 | 2.61133  | 1389.9757 | 1403.1022 | 1404.8607 |
| H  | 5.89764  | -6.42030 | 2.27887  | 1407.3884 | 1410.6001 | 1422.7053 |
| H  | 5.34475  | -6.06428 | -0.10525 | 1429.7860 | 1448.8792 | 1455.6513 |
| H  | 4.03557  | -5.53875 | 0.88756  | 1460.0216 | 1467.6832 | 1483.7137 |
| C  | -1.02177 | 0.10078  | 1.64259  | 1493.8187 | 1499.2231 | 1507.4797 |
| N  | -0.49913 | -0.42496 | 0.59989  | 1509.5387 | 1517.2265 | 1517.6495 |
| N  | -1.39487 | -0.53101 | -0.43536 | 1518.2662 | 1524.0851 | 1529.7965 |
| O  | -2.27101 | 0.43388  | 1.79368  | 1542.1700 | 1543.6276 | 1547.6949 |
| C  | -1.35968 | -1.50558 | -1.25164 | 1556.3300 | 1556.9284 | 1559.9780 |
| C  | -4.54280 | -1.74586 | -4.04636 | 1568.1530 | 1577.7903 | 1602.7825 |
| C  | -4.55077 | -0.73737 | -3.07797 | 1616.2467 | 1617.1450 | 1618.5136 |
| C  | -3.49942 | -0.67409 | -2.20630 | 1618.8626 | 1622.4582 | 1623.7679 |
| C  | -2.41893 | -1.58336 | -2.24644 | 1623.8934 | 1625.6910 | 1627.6004 |
| C  | -2.44878 | -2.57725 | -3.23178 | 1627.8452 | 1632.8105 | 1634.3670 |
| C  | -3.50134 | -2.66283 | -4.12731 | 1643.0196 | 1649.5933 | 1656.2707 |
| H  | -5.34587 | -0.01853 | -3.05716 | 1658.0678 | 1662.7635 | 1663.9646 |
| H  | -3.51118 | -3.43131 | -4.88035 | 1667.7232 | 1668.2416 | 1674.9453 |
| O  | -3.45348 | 0.30581  | -1.25356 | 1680.9078 | 1688.9505 | 1693.9011 |
| H  | 3.05467  | 0.67524  | 3.86689  | 1724.0849 | 1736.0147 | 1763.5136 |
| H  | -0.60081 | -2.26768 | -1.19172 | 1766.4541 | 1772.4739 | 1788.6880 |
| H  | 3.28094  | 6.41605  | 0.62104  | 1809.1662 | 1812.4719 | 1823.6513 |
| H  | 4.18202  | 7.14504  | -0.69423 | 1840.4014 | 2063.4484 | 3187.6762 |
| H  | 2.75109  | 7.94337  | -0.06690 | 3195.7367 | 3195.7588 | 3197.5764 |
| H  | 2.10936  | -2.08699 | 2.68621  | 3204.7471 | 3231.6654 | 3234.7565 |
| Zn | -3.79583 | 0.23537  | 0.73175  | 3241.2847 | 3245.6582 | 3249.2817 |
| O  | -5.66137 | 0.15587  | 1.31488  | 3250.8435 | 3253.3261 | 3262.0693 |
| C  | -6.81923 | 0.19665  | 0.41976  | 3262.3596 | 3265.3491 | 3267.3514 |
| C  | -6.08265 | 0.09518  | 2.71563  | 3273.0651 | 3274.0079 | 3275.0236 |
| C  | -7.99693 | 0.44949  | 1.34485  | 3278.9173 | 3288.3687 | 3289.5930 |
| C  | -7.56314 | -0.23292 | 2.64289  | 3292.8619 | 3296.3746 | 3298.1159 |
| H  | -6.87496 | -0.76293 | -0.07576 | 3317.9865 | 3321.8930 | 3340.5265 |
| H  | -6.64635 | 0.97805  | -0.30558 | 3350.7535 | 3361.1481 | 3369.1641 |
| H  | -8.91372 | 0.04288  | 0.93924  | 3372.2280 | 3386.8406 | 3387.4558 |
| H  | -8.13618 | 1.51364  | 1.49836  | 3392.3074 | 3406.5426 | 3412.1592 |
| H  | -8.09390 | 0.13407  | 3.51120  | 3432.9580 | 3437.6564 | 3439.8214 |
| H  | -7.71087 | -1.30531 | 2.58205  | 3448.1004 | 4172.5132 | 4174.2154 |
| H  | -5.48133 | -0.65609 | 3.20661  |           |           |           |
| H  | -5.89156 | 1.06601  | 3.15218  |           |           |           |
| H  | -2.41796 | 0.23282  | -0.90153 |           |           |           |
| O  | -5.57907 | -1.77157 | -4.87217 |           |           |           |
| O  | -1.42375 | -3.42881 | -3.25140 |           |           |           |
| H  | -5.51296 | -2.44738 | -5.52910 |           |           |           |
| H  | -1.50191 | -4.07355 | -3.93752 |           |           |           |

### Statistical Thermodynamic Analysis

Temperature=298.15 K

Pressure=1 atm

Zero-point correction= 0.826927

Electronic Energy = -2232.63711276

Internal Energy (E)= -2231.76476976

Enthalpy (H)= -2231.76382576

Gibbs Free Energy (G)=-2231.89649676

Gibbs Free Energy of Solvation=-2232.07670509

|  |
|--|
|  |
|--|

| St.Pt.                              | General Structure | Ball & Stick model        |          |          |          |          |
|-------------------------------------|-------------------|---------------------------|----------|----------|----------|----------|
| <b>E</b>                            |                   |                           |          |          |          |          |
| <b><u>Cartesian co-ordinate</u></b> |                   | <b><u>Frequencies</u></b> |          |          |          |          |
| -----                               |                   |                           |          |          |          |          |
| Atoms                               | X                 | Y                         | Z        |          |          |          |
| -----                               |                   |                           |          |          |          |          |
| C                                   | -3.75286          | -2.87661                  | -1.49099 | 7.7831   | 10.9635  | 17.3106  |
| C                                   | -2.90266          | -1.87350                  | -1.84313 | 17.6634  | 27.1296  | 28.4688  |
| C                                   | -2.85574          | -0.64248                  | -1.12731 | 30.8846  | 31.8724  | 39.0195  |
| C                                   | -3.71975          | -0.53592                  | -0.00283 | 45.3943  | 49.6342  | 54.4004  |
| C                                   | -4.58938          | -1.53401                  | 0.37406  | 59.3731  | 61.2586  | 70.3219  |
| C                                   | -4.65300          | -2.73619                  | -0.37338 | 73.5824  | 85.3809  | 86.7069  |
| C                                   | -2.02721          | 0.43769                   | -1.45951 | 93.9008  | 102.1705 | 109.6210 |
| C                                   | -2.93661          | 1.64503                   | 0.45105  | 112.2749 | 124.5352 | 132.5481 |
| C                                   | -2.07269          | 1.60296                   | -0.67286 | 139.5270 | 151.4143 | 158.8918 |
| C                                   | -1.33126          | 2.78737                   | -0.93907 | 160.7500 | 171.6222 | 174.1327 |
| H                                   | -0.68678          | 2.81158                   | -1.81220 | 180.8306 | 195.5146 | 196.4785 |
| C                                   | -1.43286          | 3.89245                   | -0.14819 | 206.6707 | 215.3764 | 223.4364 |
| C                                   | -2.29757          | 3.91349                   | 1.00505  | 224.2867 | 229.0500 | 235.1982 |
| C                                   | -3.05618          | 2.74788                   | 1.26957  | 243.3894 | 265.9217 | 269.7840 |
| H                                   | -3.76635          | -3.78114                  | -2.08366 | 273.3674 | 278.3633 | 287.4626 |
| H                                   | -5.20141          | -1.36373                  | 1.24887  | 296.8044 | 303.7706 | 308.0688 |
| H                                   | -0.86839          | 4.77386                   | -0.41796 | 325.7982 | 337.4777 | 345.4280 |
| H                                   | -3.75899          | 2.68467                   | 2.08703  | 361.4660 | 368.8821 | 381.8037 |
| C                                   | -1.22569          | 0.40959                   | -2.71614 | 390.8798 | 405.8172 | 409.3468 |
| C                                   | -1.94619          | 0.53749                   | -3.90694 | 421.6060 | 424.8791 | 430.8588 |
| C                                   | 0.17875           | 0.33386                   | -2.77220 | 436.9502 | 448.2964 | 450.4155 |
| C                                   | -1.29631          | 0.60519                   | -5.13547 | 460.6554 | 473.5655 | 480.3195 |
| C                                   | 0.81982           | 0.41501                   | -4.01151 | 484.1175 | 492.4476 | 514.2777 |
| C                                   | 0.09263           | 0.54914                   | -5.18748 | 516.6636 | 534.6047 | 545.9841 |
| H                                   | -1.87589          | 0.70906                   | -6.04645 | 562.2212 | 565.1469 | 571.7273 |
| H                                   | 0.60708           | 0.60741                   | -6.14033 | 591.2562 | 599.8989 | 607.0082 |
| H                                   | 1.90201           | 0.36614                   | -4.03648 | 616.0198 | 636.6447 | 645.6774 |
| N                                   | -5.52078          | -3.71327                  | -0.05930 | 649.7060 | 659.5649 | 661.0143 |
|                                     |                   |                           |          | 669.7138 | 679.7813 | 684.9354 |
|                                     |                   |                           |          | 692.8268 | 704.5997 | 708.4404 |
|                                     |                   |                           |          | 720.2732 | 728.4575 | 732.6650 |
|                                     |                   |                           |          | 751.6361 | 755.0043 | 759.3409 |

|    |          |          |          |           |           |           |
|----|----------|----------|----------|-----------|-----------|-----------|
| C  | -6.52799 | -3.53998 | 0.99054  | 779.7616  | 793.5563  | 808.6657  |
| C  | -5.55108 | -4.99897 | -0.76387 | 809.2967  | 810.0553  | 811.8927  |
| C  | -6.00253 | -3.92384 | 2.37025  | 825.0784  | 837.1763  | 843.9018  |
| C  | -6.41693 | -4.95459 | -2.01886 | 846.7364  | 848.3766  | 850.5033  |
| N  | -2.38880 | 5.00382  | 1.79609  | 852.4621  | 867.2431  | 868.7387  |
| C  | -3.38772 | 5.00033  | 2.88084  | 877.5637  | 879.3284  | 896.6263  |
| C  | -1.71969 | 6.25571  | 1.42874  | 916.5666  | 920.8007  | 933.7044  |
| C  | -3.39439 | 6.23912  | 3.76251  | 935.8338  | 943.3096  | 947.1856  |
| C  | -2.48982 | 7.04506  | 0.37391  | 947.4476  | 956.5697  | 957.7322  |
| O  | -3.71766 | 0.58232  | 0.75880  | 975.7520  | 983.7118  | 997.2295  |
| H  | -4.16549 | 6.10441  | 4.52348  | 998.6947  | 1005.8039 | 1012.3004 |
| H  | -2.44213 | 6.37936  | 4.27878  | 1034.0605 | 1035.6234 | 1047.4770 |
| H  | -3.63700 | 7.14769  | 3.20701  | 1049.6683 | 1049.8399 | 1067.7193 |
| H  | -4.38283 | 4.86082  | 2.43788  | 1070.0205 | 1084.5925 | 1096.0987 |
| H  | -3.18844 | 4.12716  | 3.51174  | 1105.3739 | 1108.2173 | 1112.3774 |
| H  | -1.60122 | 6.84811  | 2.33415  | 1117.4629 | 1126.6667 | 1130.4217 |
| H  | -0.70544 | 6.02531  | 1.09636  | 1150.5244 | 1157.7026 | 1163.0068 |
| H  | -6.78323 | -3.79341 | 3.12259  | 1170.9066 | 1179.3886 | 1189.0304 |
| H  | -5.68767 | -4.97054 | 2.38470  | 1193.5752 | 1194.6064 | 1199.2505 |
| H  | -5.14383 | -3.30805 | 2.65068  | 1206.9357 | 1213.9621 | 1214.2143 |
| H  | -6.89053 | -2.50924 | 0.97094  | 1230.1276 | 1233.2725 | 1235.2948 |
| H  | -7.38057 | -4.16841 | 0.71932  | 1249.7983 | 1254.8852 | 1257.8662 |
| H  | -7.44445 | -4.67776 | -1.76941 | 1261.3994 | 1273.7648 | 1285.2022 |
| H  | -6.03518 | -4.22322 | -2.73601 | 1293.9736 | 1296.9049 | 1300.2729 |
| H  | -6.43693 | -5.93473 | -2.50030 | 1311.9327 | 1316.4862 | 1319.0312 |
| H  | -5.94332 | -5.73415 | -0.05602 | 1321.3203 | 1333.9928 | 1339.6732 |
| H  | -4.52942 | -5.31251 | -0.98996 | 1339.9824 | 1349.6838 | 1371.2898 |
| C  | 1.02804  | 0.12712  | -1.56937 | 1377.0377 | 1378.4504 | 1383.9901 |
| N  | 0.45776  | -0.37836 | -0.50756 | 1395.1797 | 1397.4014 | 1408.5551 |
| N  | 1.34953  | -0.46158 | 0.54487  | 1408.9714 | 1412.2695 | 1418.0294 |
| O  | 2.28900  | 0.44092  | -1.68164 | 1418.4461 | 1422.6040 | 1429.4157 |
| C  | 1.41383  | -1.48519 | 1.36635  | 1432.3329 | 1433.8321 | 1435.4221 |
| C  | 4.47119  | -2.16061 | 4.16327  | 1437.6142 | 1447.6604 | 1453.3582 |
| C  | 4.69263  | -1.21745 | 3.15801  | 1467.8849 | 1475.4837 | 1493.2025 |
| C  | 3.69877  | -0.93967 | 2.22927  | 1497.5520 | 1501.5713 | 1504.0799 |
| C  | 2.43613  | -1.63650 | 2.32223  | 1504.5816 | 1506.4986 | 1509.7595 |
| C  | 2.26890  | -2.62306 | 3.33973  | 1510.5054 | 1510.8063 | 1515.7981 |
| C  | 3.26211  | -2.87806 | 4.25848  | 1517.5574 | 1524.4744 | 1527.2452 |
| H  | 5.64163  | -0.69904 | 3.11179  | 1530.2393 | 1533.9667 | 1542.5824 |
| H  | 3.11668  | -3.61220 | 5.04518  | 1546.5298 | 1552.1601 | 1553.4335 |
| O  | 3.92268  | -0.06324 | 1.26649  | 1560.7937 | 1567.7936 | 1574.0800 |
| H  | -3.02914 | 0.60285  | -3.86084 | 1576.8072 | 1583.1798 | 1601.7243 |
| H  | 0.64194  | -2.24144 | 1.24209  | 1627.0145 | 1632.8460 | 1640.2804 |
| H  | -2.61137 | 6.46583  | -0.54563 | 1647.5684 | 1673.9927 | 1685.6665 |
| H  | -3.48648 | 7.30592  | 0.73994  | 1694.3370 | 1712.9373 | 1722.7746 |
| H  | -1.96296 | 7.97084  | 0.13210  | 1738.5615 | 3059.3104 | 3075.2290 |
| H  | -2.24581 | -2.00095 | -2.69723 | 3084.0200 | 3087.2778 | 3091.8126 |
| Zn | 3.79891  | -0.08187 | -0.63012 | 3106.2042 | 3106.6101 | 3107.2976 |
| O  | 5.54718  | -0.11981 | -1.53751 | 3111.5202 | 3114.1110 | 3117.4886 |
| C  | 6.79774  | -0.30309 | -0.79066 | 3120.4086 | 3124.5906 | 3147.4587 |
| C  | 5.82242  | 0.25723  | -2.92697 | 3152.8899 | 3153.0942 | 3167.6122 |
| C  | 7.85015  | 0.33570  | -1.67891 | 3170.9469 | 3171.7321 | 3174.8430 |
| C  | 7.31851  | 0.03330  | -3.08383 | 3175.5852 | 3177.5219 | 3180.2655 |
| H  | 6.95101  | -1.37900 | -0.67053 | 3180.9802 | 3182.0016 | 3188.4113 |



|   |         |          |          |           |           |           |
|---|---------|----------|----------|-----------|-----------|-----------|
| H | 6.66701 | 0.16751  | 0.18553  | 3192.7937 | 3193.1287 | 3217.0631 |
| H | 8.83979 | -0.08660 | -1.50091 | 3221.9181 | 3223.2729 | 3226.1391 |
| H | 7.89578 | 1.41419  | -1.50484 | 3234.6027 | 3235.4201 | 3241.8320 |
| H | 7.74473 | 0.68375  | -3.84844 | 3246.6459 | 3252.8604 | 3261.2667 |
| H | 7.52330 | -1.00495 | -3.35808 | 3275.9018 | 3277.2806 | 3287.2215 |
| H | 5.20230 | -0.37047 | -3.56876 | 3521.9652 | 3868.8980 | 3871.0530 |
| H | 5.54311 | 1.30774  | -3.04546 |           |           |           |
| H | 1.91820 | 0.35202  | 0.77747  |           |           |           |
| O | 5.47072 | -2.35450 | 5.02403  |           |           |           |
| O | 1.08211 | -3.25654 | 3.34378  |           |           |           |
| H | 5.24384 | -3.00977 | 5.69596  |           |           |           |
| H | 1.05623 | -3.93211 | 4.03295  |           |           |           |

### Statistical Thermodynamic Analysis

Temperature=298.15 K

Pressure=1 atm

Zero-point correction= 0.786829

Electronic Energy = -2247.15318190

Internal Energy (E)= -2246.3184529

Enthalpy (H)= -2246.3175079

Gibbs Free Energy (G)=-2246.4541319

Gibbs Free Energy of Solvation=-2246.62195113

### 10. Coordinate of the stationary points associated to the TD-DFT analysis:

TD-DFT method with B3LYP functional and 6-31G (d, p) basis set.

| St.Pt.                              | General Structure                                                                 |          |          | Ball & Stick model                                                                  |          |          |
|-------------------------------------|-----------------------------------------------------------------------------------|----------|----------|-------------------------------------------------------------------------------------|----------|----------|
| <b>E</b>                            | 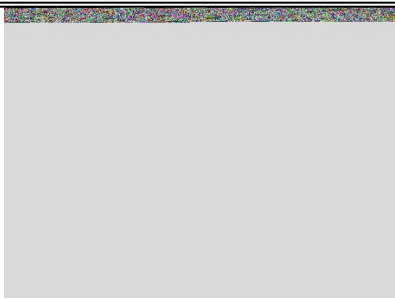 |          |          |  |          |          |
| <b><u>Cartesian co-ordinate</u></b> |                                                                                   |          |          | <b><u>Frequencies</u></b>                                                           |          |          |
| -----                               |                                                                                   |          |          |                                                                                     |          |          |
| Atoms                               | X                                                                                 | Y        | Z        |                                                                                     |          |          |
| -----                               |                                                                                   |          |          |                                                                                     |          |          |
| C                                   | -4.26320                                                                          | -2.69485 | -1.29267 | -38.1790                                                                            | 5.1771   | 7.1485   |
| C                                   | -3.25579                                                                          | -1.83897 | -1.70941 | 14.8700                                                                             | 17.3130  | 21.9359  |
| C                                   | -3.00591                                                                          | -0.58836 | -1.09420 | 27.2355                                                                             | 27.5631  | 30.6512  |
| C                                   | -3.83310                                                                          | -0.28192 | 0.00148  | 43.0837                                                                             | 45.4126  | 46.0276  |
| C                                   | -4.86125                                                                          | -1.12369 | 0.45090  | 52.1575                                                                             | 56.0013  | 57.8908  |
| C                                   | -5.11439                                                                          | -2.36075 | -0.20558 | 66.6662                                                                             | 70.4384  | 85.2118  |
| C                                   | -2.01312                                                                          | 0.34405  | -1.50391 | 91.3644                                                                             | 95.5548  | 102.8223 |
| C                                   | -2.76616                                                                          | 1.78345  | 0.32146  | 107.9489                                                                            | 113.1139 | 117.3633 |
| C                                   | -1.91456                                                                          | 1.56257  | -0.77262 | 135.6621                                                                            | 142.4515 | 151.2253 |
| C                                   | -1.03223                                                                          | 2.62782  | -1.07207 | 155.4875                                                                            | 162.0309 | 172.7782 |
| H                                   | -0.37690                                                                          | 2.51760  | -1.93040 | 189.9503                                                                            | 194.2561 | 204.4057 |
| C                                   | -0.99585                                                                          | 3.80547  | -0.34062 | 212.6912                                                                            | 219.1774 | 223.7287 |
| C                                   | -1.85120                                                                          | 4.01523  | 0.77511  | 228.5966                                                                            | 231.1469 | 232.6541 |
| C                                   | -2.75620                                                                          | 2.96067  | 1.08468  | 236.8082                                                                            | 258.0241 | 262.2828 |
| H                                   | -4.41510                                                                          | -3.62150 | -1.82950 | 267.4515                                                                            | 269.7280 | 284.0531 |
| H                                   | -5.43561                                                                          | -0.79979 | 1.30987  | 286.4520                                                                            | 304.8390 | 315.6152 |
| H                                   | -0.31389                                                                          | 4.58365  | -0.65360 | 327.6637                                                                            | 332.4943 | 341.3424 |
| H                                   | -3.47501                                                                          | 3.03324  | 1.88946  | 352.2102                                                                            | 365.7882 | 378.9849 |
| C                                   | -1.22570                                                                          | 0.12271  | -2.73941 | 385.8901                                                                            | 402.1311 | 404.1830 |
| C                                   | -1.91859                                                                          | 0.18725  | -3.95563 | 412.3955                                                                            | 423.8221 | 425.5829 |
| C                                   | 0.16833                                                                           | -0.09914 | -2.77191 | 429.8241                                                                            | 441.4801 | 445.3605 |
| C                                   | -1.26289                                                                          | 0.04109  | -5.17303 | 447.9147                                                                            | 456.0763 | 462.9623 |
| C                                   | 0.81960                                                                           | -0.22584 | -4.00388 | 476.2440                                                                            | 485.9434 | 506.9601 |
| C                                   | 0.11432                                                                           | -0.16365 | -5.19754 | 512.9451                                                                            | 531.9809 | 546.1355 |
| H                                   | -1.82520                                                                          | 0.09895  | -6.09899 | 556.5108                                                                            | 563.1839 | 572.6493 |
| H                                   | 0.63548                                                                           | -0.27286 | -6.14227 | 572.8112                                                                            | 582.8778 | 587.0461 |
| H                                   | 1.89207                                                                           | -0.38108 | -4.00901 | 602.3216                                                                            | 623.2298 | 627.1899 |
| N                                   | -6.12711                                                                          | -3.17163 | 0.20095  | 632.8656                                                                            | 639.4161 | 644.1930 |
| C                                   | -7.08754                                                                          | -2.76505 | 1.22745  | 653.0268                                                                            | 667.9674 | 680.4707 |
| C                                   | -6.33867                                                                          | -4.49291 | -0.38658 | 694.5470                                                                            | 696.4858 | 697.1329 |
|                                     |                                                                                   |          |          | 708.0900                                                                            | 716.2412 | 728.7082 |
|                                     |                                                                                   |          |          | 732.2968                                                                            | 749.6420 | 752.1411 |
|                                     |                                                                                   |          |          | 778.2980                                                                            | 799.4724 | 802.0012 |
|                                     |                                                                                   |          |          | 805.0210                                                                            | 806.7912 | 807.8790 |

|    |          |          |          |           |           |           |
|----|----------|----------|----------|-----------|-----------|-----------|
| C  | -6.60751 | -3.09994 | 2.63906  | 811.3923  | 815.2466  | 816.7646  |
| C  | -7.19639 | -4.43595 | -1.65022 | 844.7100  | 850.4596  | 854.1314  |
| N  | -1.83033 | 5.16447  | 1.51395  | 857.8497  | 858.6092  | 866.7868  |
| C  | -2.83171 | 5.35395  | 2.57679  | 872.8076  | 875.8874  | 886.6880  |
| C  | -1.01891 | 6.29909  | 1.08170  | 910.4024  | 921.2678  | 930.6157  |
| C  | -2.65414 | 6.60377  | 3.42332  | 936.1256  | 938.3813  | 942.4046  |
| C  | -1.69072 | 7.10360  | -0.03184 | 945.2399  | 953.6830  | 954.1689  |
| O  | -3.68593 | 0.86549  | 0.69929  | 966.1701  | 969.9708  | 979.5404  |
| H  | -3.43535 | 6.60267  | 4.18612  | 981.6864  | 998.7871  | 1010.6268 |
| H  | -1.69052 | 6.61482  | 3.93764  | 1026.1433 | 1035.7770 | 1043.1062 |
| H  | -2.76448 | 7.52303  | 2.84395  | 1045.7049 | 1046.0063 | 1067.8023 |
| H  | -3.83228 | 5.35874  | 2.12062  | 1069.5774 | 1080.7036 | 1091.3260 |
| H  | -2.78633 | 4.48008  | 3.23559  | 1092.6710 | 1098.9048 | 1102.3832 |
| H  | -0.83103 | 6.93180  | 1.94790  | 1115.9779 | 1122.3948 | 1123.2696 |
| H  | -0.04063 | 5.92833  | 0.76672  | 1148.2218 | 1148.6794 | 1153.7794 |
| H  | -7.36024 | -2.80068 | 3.37202  | 1158.7099 | 1169.0522 | 1175.7395 |
| H  | -6.43748 | -4.17429 | 2.74435  | 1183.6725 | 1187.0835 | 1191.7332 |
| H  | -5.67225 | -2.58208 | 2.86902  | 1206.2386 | 1209.2532 | 1210.3345 |
| H  | -7.29820 | -1.69781 | 1.12041  | 1222.8124 | 1225.5562 | 1227.4584 |
| H  | -8.02309 | -3.28856 | 1.01205  | 1236.6017 | 1249.5024 | 1252.4939 |
| H  | -8.17543 | -4.00153 | -1.43332 | 1260.0837 | 1271.6612 | 1272.3371 |
| H  | -6.71826 | -3.82871 | -2.42292 | 1282.2827 | 1291.6039 | 1292.4496 |
| H  | -7.34989 | -5.44316 | -2.04394 | 1298.4813 | 1304.5069 | 1311.3799 |
| H  | -6.82737 | -5.10415 | 0.37735  | 1313.4608 | 1316.2191 | 1328.2468 |
| H  | -5.36885 | -4.95781 | -0.58307 | 1331.5479 | 1332.1340 | 1338.5121 |
| C  | 1.00569  | -0.21999 | -1.54877 | 1370.6785 | 1371.2766 | 1372.5070 |
| N  | 0.41918  | -0.56470 | -0.42978 | 1376.9290 | 1383.0451 | 1388.9378 |
| N  | 1.31869  | -0.58884 | 0.61558  | 1390.6617 | 1393.1791 | 1398.3740 |
| O  | 2.28466  | -0.01074 | -1.70209 | 1403.1475 | 1404.7574 | 1410.4689 |
| C  | 1.37535  | -1.54567 | 1.51225  | 1412.3181 | 1414.6721 | 1419.4072 |
| C  | 4.48333  | -2.07792 | 4.29281  | 1421.7032 | 1425.2550 | 1431.9427 |
| C  | 4.70431  | -1.22725 | 3.20808  | 1443.5457 | 1447.3864 | 1462.6438 |
| C  | 3.69434  | -0.99701 | 2.28339  | 1466.8284 | 1484.6800 | 1495.8759 |
| C  | 2.41792  | -1.64646 | 2.46032  | 1498.0502 | 1500.6237 | 1503.3084 |
| C  | 2.24745  | -2.53579 | 3.56083  | 1503.5104 | 1504.4184 | 1506.7496 |
| C  | 3.25658  | -2.74476 | 4.47558  | 1506.8979 | 1510.3815 | 1512.1862 |
| H  | 5.66646  | -0.74410 | 3.09568  | 1516.5388 | 1518.9396 | 1523.2553 |
| H  | 3.10948  | -3.40658 | 5.32400  | 1527.6721 | 1529.7808 | 1542.3291 |
| O  | 3.91614  | -0.20580 | 1.24691  | 1542.6810 | 1545.2420 | 1549.7503 |
| H  | -2.98925 | 0.36769  | -3.93494 | 1550.6604 | 1557.9326 | 1569.6707 |
| H  | 0.58381  | -2.29009 | 1.46456  | 1572.6447 | 1604.6267 | 1617.6421 |
| H  | -1.87626 | 6.48005  | -0.91046 | 1620.2328 | 1634.7978 | 1645.8936 |
| H  | -2.64876 | 7.50556  | 0.30813  | 1658.5865 | 1683.1958 | 1705.4938 |
| H  | -1.05429 | 7.94093  | -0.32714 | 1716.1851 | 3040.2228 | 3084.1115 |
| H  | -2.63433 | -2.12093 | -2.55258 | 3084.7768 | 3087.2254 | 3093.2659 |
| Zn | 3.83564  | -0.31545 | -0.64060 | 3097.7659 | 3099.6212 | 3105.3612 |
| O  | 5.56036  | -0.33596 | -1.58797 | 3106.3591 | 3108.2472 | 3113.8758 |
| C  | 6.85101  | -0.40048 | -0.89331 | 3120.0814 | 3122.1089 | 3143.4451 |
| C  | 5.75151  | -0.19440 | -3.03354 | 3146.7805 | 3163.7191 | 3170.9772 |
| C  | 7.85331  | 0.05828  | -1.93875 | 3171.4879 | 3172.8685 | 3173.8451 |
| C  | 7.23435  | -0.46155 | -3.24084 | 3175.0777 | 3176.2114 | 3176.5051 |
| H  | 7.00915  | -1.43871 | -0.58925 | 3178.6216 | 3179.5451 | 3182.8283 |
| H  | 6.78186  | 0.24060  | -0.01269 | 3189.4211 | 3192.6627 | 3218.7700 |
| H  | 8.84627  | -0.35172 | -1.75050 | 3221.5102 | 3230.8458 | 3231.9677 |



|   |          |          |          |           |           |           |
|---|----------|----------|----------|-----------|-----------|-----------|
| C | 0.30310  | 2.50099  | -1.20403 | 265.4721  | 266.9549  | 268.8483  |
| H | 0.93118  | 2.24357  | -2.05368 | 285.6979  | 301.0240  | 312.5720  |
| C | 0.49779  | 3.70807  | -0.57296 | 326.4941  | 330.6750  | 338.3128  |
| C | -0.31155 | 4.09805  | 0.53315  | 348.7421  | 350.8981  | 354.0497  |
| C | -1.33326 | 3.20274  | 0.91843  | 359.6893  | 373.5139  | 395.3592  |
| H | -3.94668 | -3.22167 | -1.64522 | 400.5301  | 411.5200  | 424.5108  |
| H | -4.53953 | -0.10358 | 1.36163  | 435.8243  | 437.0818  | 444.6109  |
| H | 1.26839  | 4.36618  | -0.94901 | 449.7334  | 469.1975  | 475.2148  |
| H | -2.02674 | 3.42288  | 1.71692  | 489.0034  | 490.7257  | 508.6169  |
| C | -0.88892 | 0.37537  | -3.01479 | 523.7221  | 529.4564  | 534.4193  |
| C | -1.79689 | 1.03635  | -3.82153 | 554.0360  | 563.6675  | 570.4766  |
| C | 0.19222  | -0.31074 | -3.56503 | 573.0860  | 577.1967  | 590.2467  |
| C | -1.58979 | 0.99502  | -5.20409 | 595.0438  | 600.2777  | 608.1400  |
| C | 0.41040  | -0.35548 | -4.93656 | 613.3287  | 620.4998  | 646.8975  |
| C | -0.50396 | 0.30811  | -5.75329 | 652.5099  | 655.3169  | 669.3940  |
| H | -2.28001 | 1.51175  | -5.86190 | 681.7530  | 686.2985  | 697.5094  |
| H | -0.36914 | 0.29745  | -6.82913 | 706.2340  | 713.6084  | 716.9341  |
| H | 1.26251  | -0.88553 | -5.34754 | 728.5607  | 737.8826  | 746.6118  |
| N | -5.55264 | -2.39100 | 0.34044  | 755.3870  | 776.2338  | 794.7502  |
| C | -6.45109 | -1.80711 | 1.34499  | 795.3377  | 798.4042  | 808.2091  |
| C | -5.97295 | -3.69680 | -0.18652 | 810.6150  | 814.9068  | 823.1882  |
| C | -6.02855 | -2.18597 | 2.76428  | 830.1275  | 841.2468  | 851.4149  |
| C | -6.83893 | -3.54678 | -1.43715 | 862.2870  | 867.2060  | 868.8626  |
| N | -0.11669 | 5.27812  | 1.19253  | 870.8511  | 879.9368  | 893.7152  |
| C | -1.10309 | 5.67234  | 2.20539  | 909.5961  | 913.2240  | 923.0780  |
| C | 0.78576  | 6.28340  | 0.63355  | 937.3770  | 944.6479  | 946.7380  |
| C | -0.78710 | 6.96476  | 2.94259  | 950.0458  | 956.0799  | 956.1333  |
| C | 0.17683  | 7.04863  | -0.53919 | 974.6576  | 979.2772  | 981.2520  |
| O | -2.53358 | 1.21466  | 0.73301  | 991.5558  | 999.3234  | 1004.0847 |
| H | -1.56006 | 7.12499  | 3.69682  | 1012.3157 | 1035.2180 | 1036.4537 |
| H | 0.17480  | 6.91132  | 3.45767  | 1037.9469 | 1051.7874 | 1056.5171 |
| H | -0.78800 | 7.83484  | 2.28236  | 1065.8756 | 1068.7093 | 1078.2726 |
| H | -2.09641 | 5.75096  | 1.73864  | 1090.5184 | 1094.3307 | 1104.7930 |
| H | -1.16101 | 4.86567  | 2.94493  | 1114.9726 | 1119.2702 | 1121.5770 |
| H | 1.05996  | 6.97149  | 1.43184  | 1153.9801 | 1161.0877 | 1169.8344 |
| H | 1.71807  | 5.79216  | 0.34498  | 1170.3425 | 1178.6281 | 1181.0447 |
| H | -6.73582 | -1.75862 | 3.47677  | 1185.2900 | 1189.1932 | 1196.0230 |
| H | -6.02577 | -3.27035 | 2.89513  | 1207.2049 | 1210.8520 | 1211.6271 |
| H | -5.02912 | -1.80822 | 2.99095  | 1215.5865 | 1222.2593 | 1224.2695 |
| H | -6.48672 | -0.72652 | 1.20419  | 1232.2818 | 1233.9907 | 1252.4584 |
| H | -7.44994 | -2.19201 | 1.12712  | 1254.4287 | 1271.5404 | 1274.2669 |
| H | -7.72871 | -2.94863 | -1.22848 | 1275.2452 | 1277.7142 | 1283.5963 |
| H | -6.28318 | -3.06617 | -2.24557 | 1284.1123 | 1303.4129 | 1306.0997 |
| H | -7.16295 | -4.53315 | -1.77267 | 1314.5711 | 1323.9522 | 1329.1838 |
| H | -6.53611 | -4.18296 | 0.61339  | 1330.5201 | 1330.9382 | 1335.2766 |
| H | -5.09075 | -4.30947 | -0.37157 | 1342.4705 | 1344.0253 | 1367.7705 |
| C | 0.96571  | -0.87781 | -2.46406 | 1370.6149 | 1377.9495 | 1381.6832 |
| N | 0.33055  | -0.61019 | -1.30940 | 1385.4826 | 1389.9725 | 1392.5019 |
| N | 1.01237  | -0.86533 | -0.14627 | 1393.4229 | 1398.9798 | 1415.4071 |
| O | 2.09401  | -1.46186 | -2.50179 | 1418.2281 | 1422.6351 | 1426.2232 |
| C | 0.38117  | -0.90064 | 1.05041  | 1427.3317 | 1427.7299 | 1439.0381 |
| C | 2.21048  | -2.04552 | 4.74316  | 1447.3276 | 1454.0376 | 1464.7265 |
| C | 2.80671  | -2.45137 | 3.55090  | 1498.1580 | 1498.6963 | 1503.1124 |
| C | 2.21347  | -2.10513 | 2.34559  | 1503.4152 | 1504.5266 | 1506.1310 |

|    |          |          |          |           |           |           |
|----|----------|----------|----------|-----------|-----------|-----------|
| C  | 1.03856  | -1.32719 | 2.23301  | 1507.0477 | 1507.7821 | 1510.1280 |
| C  | 0.46936  | -0.94808 | 3.49295  | 1512.1279 | 1515.5652 | 1518.4120 |
| C  | 1.02840  | -1.29384 | 4.70255  | 1519.7593 | 1522.2441 | 1529.0089 |
| H  | 3.72145  | -3.03808 | 3.55968  | 1529.2874 | 1530.2387 | 1533.7573 |
| H  | 0.57903  | -0.98653 | 5.64095  | 1542.3489 | 1548.2679 | 1551.6079 |
| O  | 2.81969  | -2.62095 | 1.17145  | 1560.7083 | 1562.3361 | 1569.6225 |
| H  | -2.63159 | 1.58659  | -3.39819 | 1588.6387 | 1605.8424 | 1642.5562 |
| H  | -0.59873 | -0.46252 | 1.16600  | 1647.8909 | 1670.4830 | 1671.9705 |
| H  | -0.10154 | 6.37089  | -1.35095 | 1685.4095 | 1691.0096 | 1699.5652 |
| H  | -0.72439 | 7.58148  | -0.22318 | 1716.9012 | 3029.1875 | 3082.7209 |
| H  | 0.88581  | 7.78227  | -0.92972 | 3087.6961 | 3092.5686 | 3094.6066 |
| H  | -1.95996 | -2.03678 | -2.40850 | 3094.9720 | 3095.7559 | 3109.1618 |
| Zn | 2.81052  | -1.58599 | -0.63091 | 3113.8963 | 3120.3063 | 3120.3852 |
| O  | 4.77631  | -1.39143 | -0.85917 | 3122.1548 | 3126.5756 | 3158.6285 |
| H  | 3.19159  | -3.49090 | 1.36394  | 3163.1124 | 3169.9273 | 3171.6495 |
| C  | 5.37519  | -1.02946 | -2.14672 | 3172.3721 | 3175.4820 | 3176.7612 |
| C  | 5.79362  | -1.45642 | 0.18547  | 3179.7967 | 3184.6763 | 3187.3637 |
| C  | 6.86648  | -1.21255 | -1.92247 | 3189.2296 | 3189.6322 | 3191.1119 |
| C  | 7.02412  | -0.82631 | -0.44825 | 3191.5561 | 3192.8788 | 3205.5883 |
| H  | 5.11025  | 0.01110  | -2.35324 | 3210.4586 | 3228.0315 | 3238.5577 |
| H  | 4.93911  | -1.67929 | -2.90626 | 3239.2717 | 3240.5100 | 3246.8990 |
| H  | 7.45705  | -0.58606 | -2.59164 | 3254.9551 | 3280.2295 | 3283.0447 |
| H  | 7.15290  | -2.25558 | -2.08193 | 3286.5831 | 3290.4356 | 3310.1517 |
| H  | 7.94644  | -1.20208 | -0.00418 | 3874.1331 | 3891.5015 | 3898.3308 |
| H  | 6.99984  | 0.26025  | -0.32969 |           |           |           |
| H  | 5.41277  | -0.92604 | 1.06052  |           |           |           |
| H  | 5.95285  | -2.51131 | 0.42842  |           |           |           |
| O  | 2.70397  | -2.33303 | 5.96350  |           |           |           |
| H  | 3.50866  | -2.85994 | 5.90104  |           |           |           |
| O  | -0.67236 | -0.22000 | 3.41126  |           |           |           |
| H  | -0.96289 | 0.02262  | 4.29812  |           |           |           |

### Statistical Thermodynamic Analysis

Temperature=298.15 K

Pressure=1 atm

Zero-point correction= 0.783235

Electronic Energy = -2247.13759144

Internal Energy (E)= -2246.30609444

Enthalpy (H)= -2246.30515044

Gibbs Free Energy (G)=-2246.44135844

Gibbs Free Energy of Solvation=-2246.62840216
